# Supplementary material for: Deactivation blocks proton pathways in the mitochondrial complex I
Source: PubMed Central journal article supplement — Proc Natl Acad Sci U S A. 2021 Jul 16;118(29):e2019498118. doi: 10.1073/pnas.2019498118 (PMC8307655; doi:10.1073/pnas.2019498118), 2021-07-16
Supplement: pnas.2019498118.sapp.pdf [file pnas.2019498118.sapp.pdf]

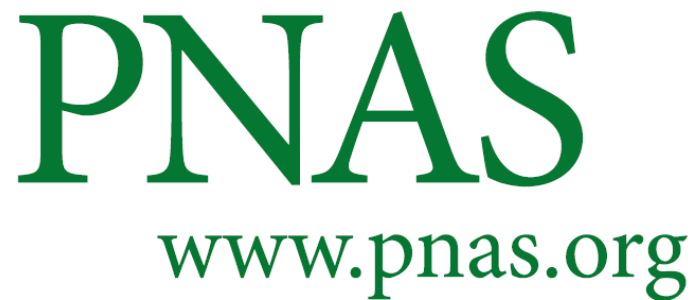

Supplementary Information for

## Deactivation blocks proton pathways in the mitochondrial complex I

Michael Röpke<sup>1</sup>, Daniel Riepl<sup>2,a</sup>, Patricia Saura<sup>2,a</sup>, Andrea Di Luca<sup>2,a</sup>, Max E. Mühlbauer<sup>1,2</sup>, Alexander Jussupow<sup>1,2</sup>, Ana P. Gamiz-Hernandez<sup>2</sup>, Ville R. I. Kaila<sup>1,2,\*</sup>

<sup>1</sup> Department Chemie, Technische Universität München (TUM), Lichtenbergstraße 4, D-85747 Garching, Germany.

<sup>2</sup> Department of Biochemistry and Biophysics, Stockholm University, 10691, Stockholm, Sweden.

<sup>a</sup> contributed equally to this work.

\* Corresponding author: Ville R. I. Kaila

**Email:** ville.kaila@dbb.su.se

### **This PDF file includes:**

SI Methods  
Figures S1 to S13  
Tables S1 to S8  
SI References

## SI Methods

### FEP calculations

Alchemical free energy perturbation (FEP) calculations were used to study the hydration free energy of the gating region in both *active* and *deactive* states, based on the last snapshots of MD simulations S19 and S23 (Table S1), respectively. To enhance the sampling, the simulation system comprised subunits ND1, ND2 (residues 1-150), ND3, ND4L and ND6, and all water molecules within 3 Å of these subunits. Water molecules close to the cavity between Asp66<sup>ND3</sup> and Glu34<sup>ND4L</sup> were removed to prevent interference with the created/annihilated water wire, comprising five water molecules between Asp66<sup>ND3</sup> and Glu34<sup>ND4L</sup>, as observed in the unbiased MD simulations. Asp66<sup>ND3</sup> was modeled protonated, mimicking a state in which the water wire would enable pT to Glu34<sup>ND4L</sup>. The system was embedded in a POPC/POPE/cardiolipin lipid membrane, re-solvated in TIP3P water and neutralized with NaCl to a concentration of 150 mM by adding 135 Na<sup>+</sup> and 65 Cl<sup>-</sup> ions. The FEP-model comprised *ca.* 120,000 atoms and was relaxed for 20 ns with initial harmonic constraints with a force constant of 3 kcal mol<sup>-1</sup> Å<sup>-2</sup> acting on the position of the all protein atoms and water molecules. The harmonic constraints on the protein were thereafter removed, followed by equilibration and FEP simulations. External forces were applied to prevent new water molecules from entering into the protein interior. All simulation parameters were analogous to those used in the complete complex I system setup (see Main text methods), unless otherwise stated.

The FEP calculations were conducted by applying flat-bottom distance constraints between the introduced water molecules as well as Asp66<sup>ND3</sup> and Glu34<sup>ND4L</sup> using the Colvars (1) module of NAMD. Bulk water molecules were prevented from entering into the protein interior by using a harmonic restraint introduced on the water oxygen positions with a force constant of 0.02 kcal mol<sup>-1</sup> Å<sup>-2</sup>. No constraints were applied on the protein atoms during production simulations to allow for the structural relaxation of the cavity upon introduction of the water chain between Asp66<sup>ND3</sup> and Glu34<sup>ND4L</sup>. Sampling was done in 20 equidistant windows from  $\lambda=0$  (wire completely decoupled) to  $\lambda=1$  (wire fully coupled) in forward and backward directions with 1 ns equilibration and 10 ns production simulations for each window, with a total sampling for 220 ns for each FEP simulation. The convergence was further tested using two 44 ns replicas with 0.2 ns equilibration and 2 ns production per window. Benchmarking simulations (0.5 ns per window) were conducted to probe the effect of splitting vdW and electrostatics and the number of windows used. The FEP simulations included in total 2.5  $\mu$ s MD sampling. All FEP simulations yielded similar results when compared to the full-scale simulations indicating robust results, with a standard deviation of *ca.* 1 kcal mol<sup>-1</sup> for the statistical error. Estimation of the accuracy of the non-polarizable CHARMM36 force field in prediction of hydration free energies is outside the scope of the present work. To probe the transfer free energy from bulk to the protein interior, five water molecules were removed/created in a 50 x 50 x 50 Å water box, with a 150 mM NaCl concentration (11 Na<sup>+</sup>/Cl<sup>-</sup>) using the same FEP-protocol as for the complex I models, but without addition of constraints. All FEP simulations were conducted using the NAMD-FEP implementation and analyzed with the ParseFEP plugin (2) in VMD employing the Bennet acceptance ratio (BAR) method (3).

### MD simulations with a hydronium species in the water chain

Simulations with an explicit H<sub>3</sub>O<sup>+</sup> species were started from different snapshots of the deactive state simulation S23 with Asp66<sup>ND3</sup> in a deprotonated state (see Table S1) and the H<sub>3</sub>O<sup>+</sup> modeled next to the Asp66<sup>ND3</sup> carboxylate in the cavity connecting to Glu34<sup>ND4L</sup>. These states were propagated for 110 ns and the water content of the cavity was subsequently evaluated in a cumulative manner. Classical force field parameters for the hydronium ion were derived at the B3LYP-D3/def2-TZVP level using Turbomole 7.5 (15), converting the molecular Hessian into force constants using Hess2FF (26), and applying the RESP procedure (27) for calculation of atomic point charges. Lennard-Jones parameters were taken from the TIP3P water parameters implemented in the CHARMM36 (28) force field. The full set of parameters is reported in SI Appendix, Table S9.

### DFT benchmarking and reaction pathway calculations

The quantum chemical calculations were benchmarked at the DFT level using B3LYP-D3 (4,5,6), CAM-B3LYP-D3 (6,7), CAMh-B3LYP-D3 (6,8),  $\omega$ B97XD (6,9), TPSSh-D3 (6,10), and by using the correlated *ab initio* random phase approximation (RPA) (11) and domain-based local pair natural orbital coupled cluster with single-double and perturbative triples (DLPNO-CCSD(T)) (12). def2-TZVP basis sets (13) were used for the DFT calculations and aug-cc-pVTZ (14) basis sets at the correlated levels. Single point energy calculations were performed for model systems comprising 27, 131, and 381 atoms, constructed from DFT models 1-3 (see Table S4), and involving proton transfer reactions between carboxylates (Asp66<sup>ND3</sup>, Glu34<sup>ND4L</sup>, Glu70<sup>ND4L</sup>) and water molecules. The DFT calculations of the large model systems were performed using an implicit polarizable medium with  $\epsilon=4$ , whereas the calculations for small and intermediate models were done in gas phase. The benchmarking calculations were performed using TURBOMOLE v7.4-7.5 (15) for the DFT and RPA calculations, and ORCA v4.2 (16) for the DLPNO-CCSD(T) calculations. See Table S7 for the quantum chemical benchmarking results.

Reaction pathways of the proton transfer reactions in the DFT models were optimized using a minimum energy reaction pathway optimization approach (29) that resembles the zero-temperature string method. To this end, the initial guess of the reaction pathway was constructed by optimization of the structures with the proton on the donor and acceptor states, followed by interpolating 19 intermediate structures between the two states using the linear synchronous transit method. The reaction pathway was refined by constraining equally spaced intermediate structures with a quadratic potential (29) until the root-mean-square difference of the gradient varied less than  $10^{-4}$  au in subsequent optimization steps. Numerical estimation of the Hessian showed one imaginary frequency ( $> 500 \text{ cm}^{-1}$ ) for the approximate transition state structure. See Ref. (29) for further methodological details of the reaction pathway optimization approach. The overall reaction process predicted by this approximate reaction pathway method resembles that obtained from our QM/MM umbrella sampling calculations, along the geometric reaction coordinate  $R$  (see methods).

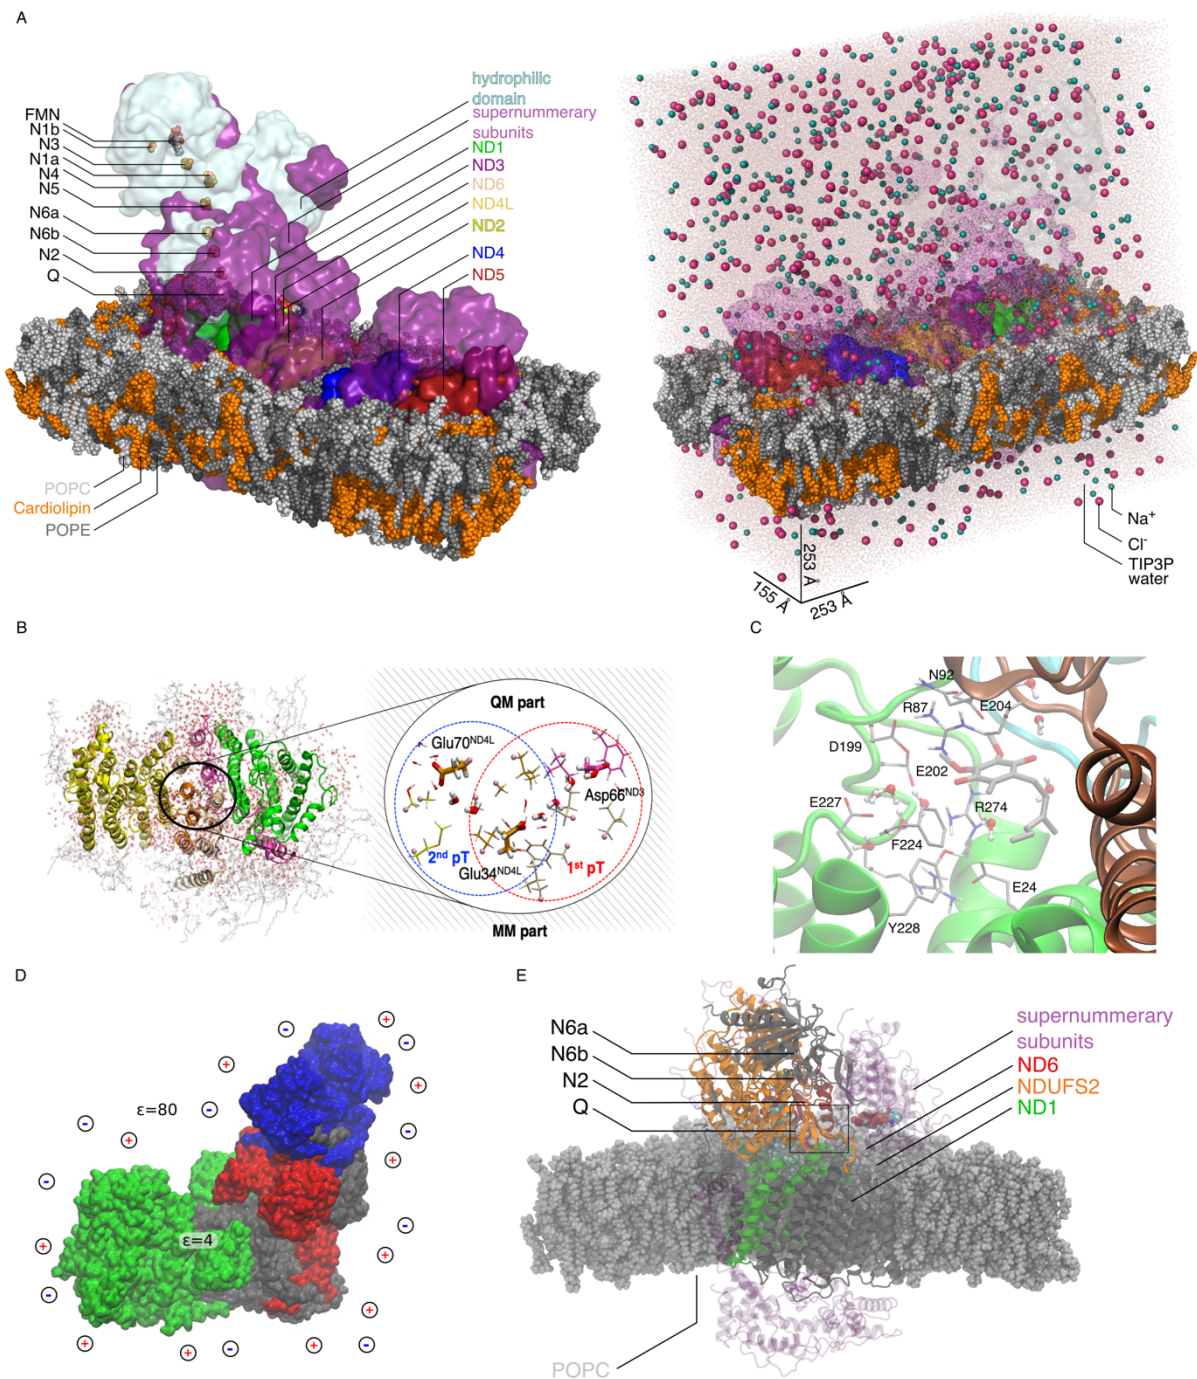

**Fig. S1. Molecular models.** **A**, MD simulation setup of the mitochondrial complex I. **B**, QM and QM/MM models for probing proton transfer at the ND3/ND4L/ND6/ND2 interface. **C**, QM region used in QM/MM MD simulations of binding site 2, with residues shown in licorice, modeled at the DFT level (see *Methods*). **D**, models used in PB/MC-electrostatic calculations. **E**, models used for exploration of the Q<sub>10</sub> dynamics with atomistic- and coarse-grained MD.



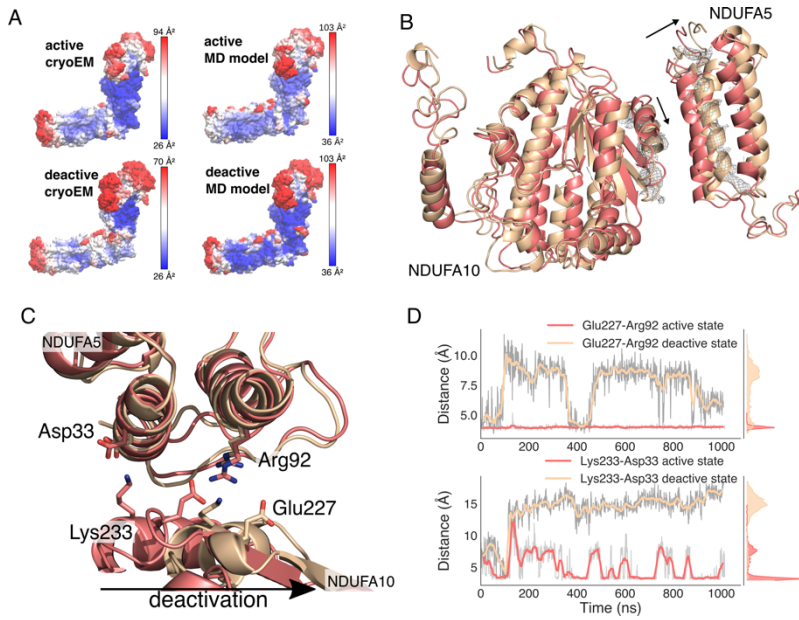

**Fig. S2. Conformational changes linked to complex I deactivation.** **A**, Comparison of dynamics inferred from MD simulations and B-factors obtained from cryoEM data. **B**, Conformational changes around the NDUFA10/5 subunit linked to the A/D transition in MD simulations. **C**, **D**, ion pairs at the NDUFA10/5 interface undergo conformational rearrangement during the MD simulations of the respective states.

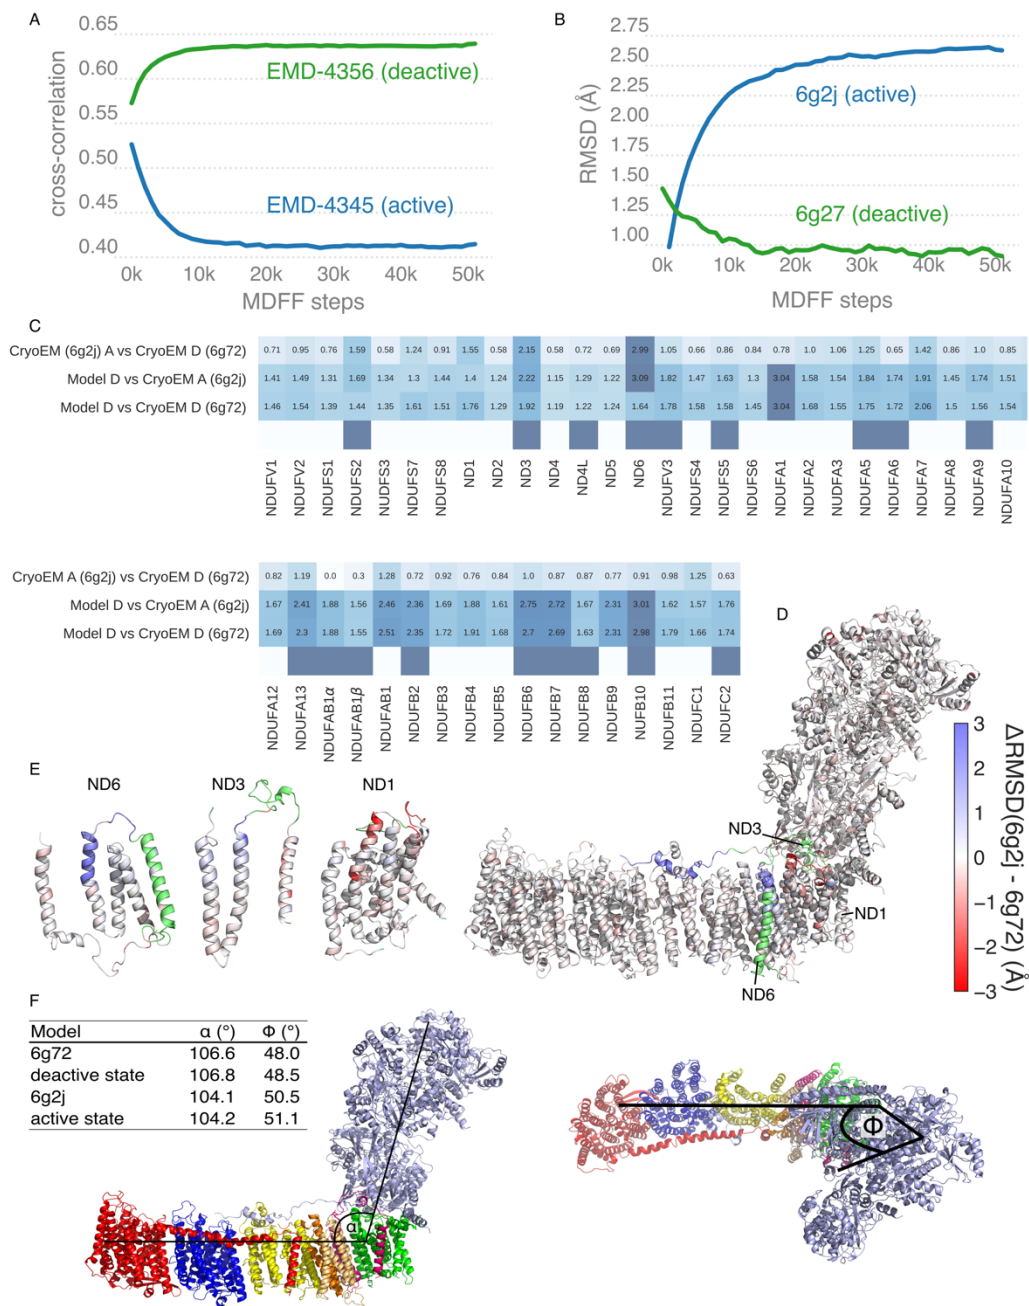

**Fig. S3. Structural characterization of the deactive model.** **A**, Cross-correlation between calculated density during the MDFF simulations and the cryoEM density map of the *active* (EMDB: 4345) and *deactive* state (EMDB: 4356). **B**, The *root-mean-square-deviation* (RMSD) of the *deactive* state model during MDFF relative to experimentally refined structures of the D (PDB ID: 6g72) and A (PDB ID: 6g2j) states. The RMSD was calculated on a backbone level for the resolved regions. **C**, Subunit-wise RMSD relative of the D state model relative to cryoEM-refined models of the D (PDB ID: 6g72) and A (PDB ID: 6g2j) states. **D** and **E**, RMSD difference between the D state model to the cryoEM-refined models of the D (PDB ID: 6g72) and A (PDB ID: 6g2j) states. Unobserved regions in either cryoEM models are colored green. **F**, Bending angles ( $\alpha$ ) and dihedral angles ( $\phi$ ) between the hydrophilic and membrane domains in the *active* and *deactive* states. The angles were determined using the principal axes of a subset of specific subunits for the respective domains (hydrophilic: NDUFV1, NDUFV2, ND1; membrane: ND5, ND4, ND2).

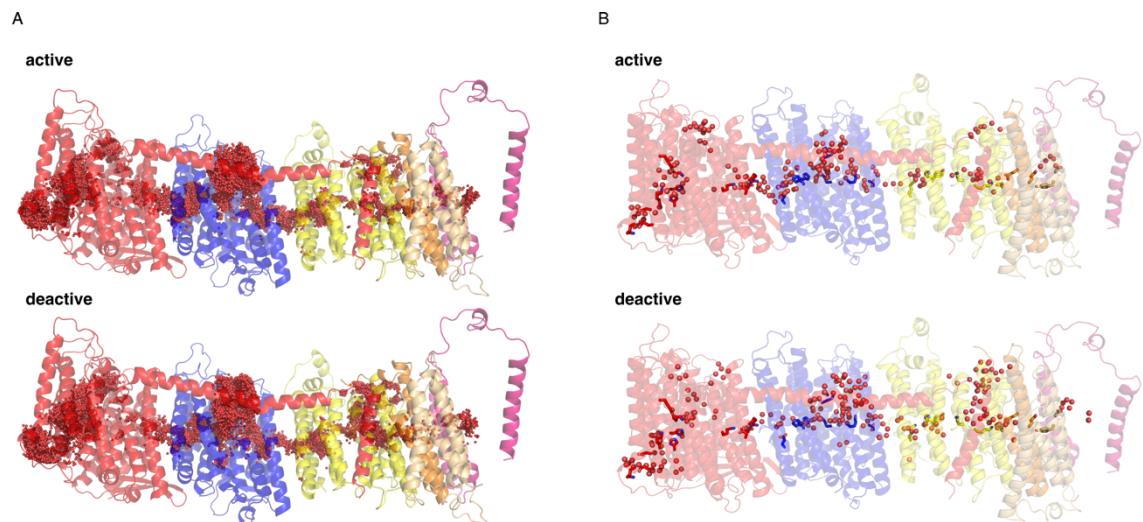

**Fig. S4. Comparison of proton pathways in the *active* and *deactive* state MD simulations. **A**, Water dynamics (red spheres) shown as an ensemble average of the 2  $\mu$ s MD simulations of the *active* state (*top*, simulations S1+S2) and *deactive* state (*bottom*, simulations S6+S7). **B**, Snapshot of individual buried water molecules (red spheres) after 1  $\mu$ s MD simulation (*top*: *active* state simulations S1+S2; *bottom*: *deactive* state, simulations S6+S7).**

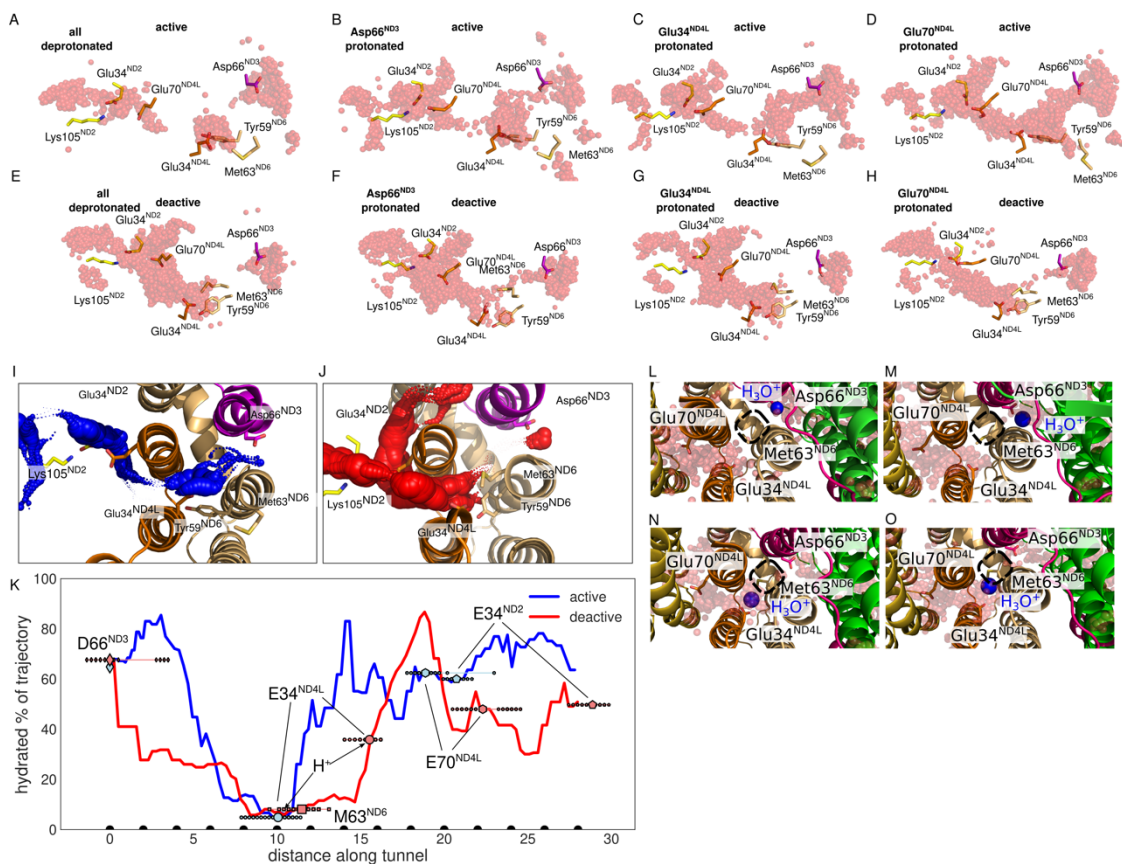

**Fig. S5. MD simulations exploring proton transfer along the ND3/ND4L/ND6 region.** The simulations show the effect of modeling different protonation states in Asp66<sup>ND3</sup>, Glu34<sup>ND4L</sup>/Tyr59<sup>ND6</sup>, and Glu70<sup>ND4L</sup>, mimicking proton transfer via the region in the *active* (left, A-D) and *deactive* (right, E-I) state simulations. **E, J**, Hydration average of the tunnels from MD simulations in the *active* (red) and *deactive* (blue) states with Asp66<sup>ND3</sup> protonated. The shown diameter is proportional to the water content (see *Methods*). **K**, Hydration fraction along the tunnels connecting the acidic residues along the ND3/ND4L/ND6 gating region when Glu34<sup>ND4L</sup> is protonated. The tunnel distances correspond to the beads shown in panel K. Functional residues along the tunnel are indicated with differently shaped markers (diamond: D66<sup>ND3</sup>, circle: E34<sup>ND4L</sup>, hexagon: E70<sup>ND4L</sup>, pentagon: E34<sup>ND2</sup>, (deactive only) square: M63<sup>ND6</sup>). The mean position is indicated with a larger size marker. **L-O**, Hydration dynamics during 110 ns trajectories with a classically modelled H<sub>3</sub>O<sup>+</sup> species, placed next to Asp66<sup>ND3</sup> (panels L, M) or Glu34<sup>ND4L</sup> (panels N, O) in the deactive state. The cavity, marked with a black frame, remains dry on the simulation timescale in the studied states, suggesting that the thermodynamic cost of hydrating this region could be high in the deactive state.



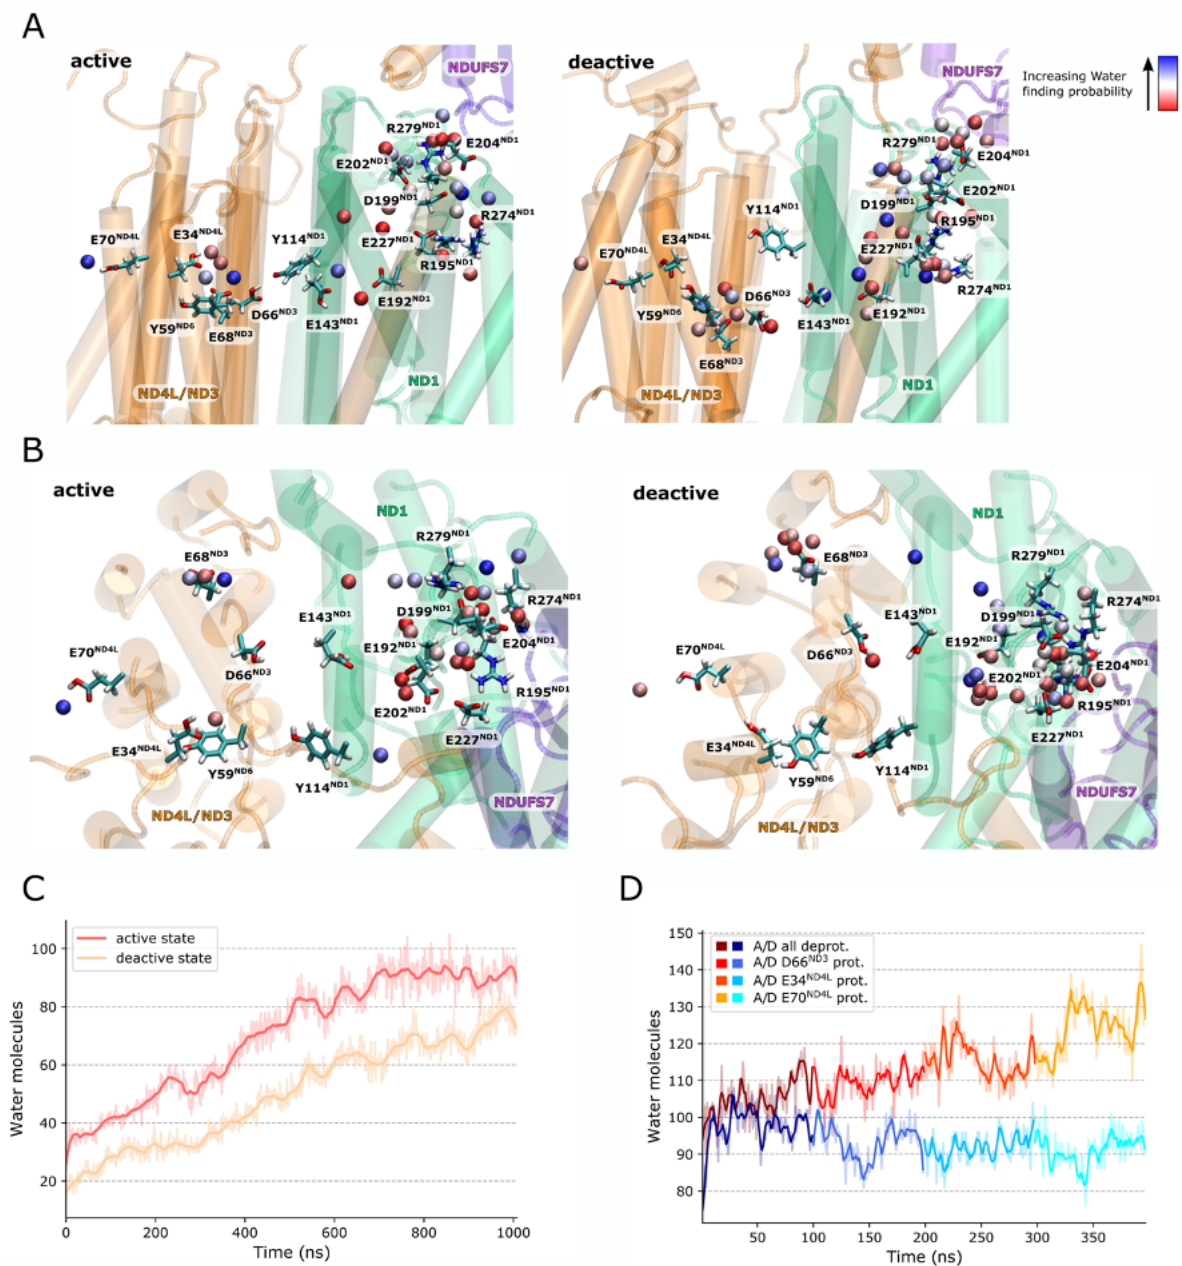

**Fig. S6. Water cluster analysis and hydration dynamics.** **A, B,** Top/side view of water cluster analysis for the ND1/ND3/ND4L/ND6 region obtained based on 1000 ns MD simulations of the *active* and *deactive* states (simulations S1 and S6, Table S1). The water shown are high probability water molecules identified in the cluster analysis (25). **C,** Hydration dynamics in the ND1/ND3/ND4L/ND6 region during *active* and *deactive* state MD simulations (simulations S1 and S6, Table S1). **D,** Hydration dynamics in the ND1/ND3/ND4L/ND6 region induced by shifting the proton during consecutive 100 ns steps along the Asp66<sup>ND3</sup>, Glu34<sup>ND4L</sup>, Glu70<sup>ND4L</sup> (simulations S18-S21, Table S1) The simulations were initiated from 1000 ns frame shown in panel C.

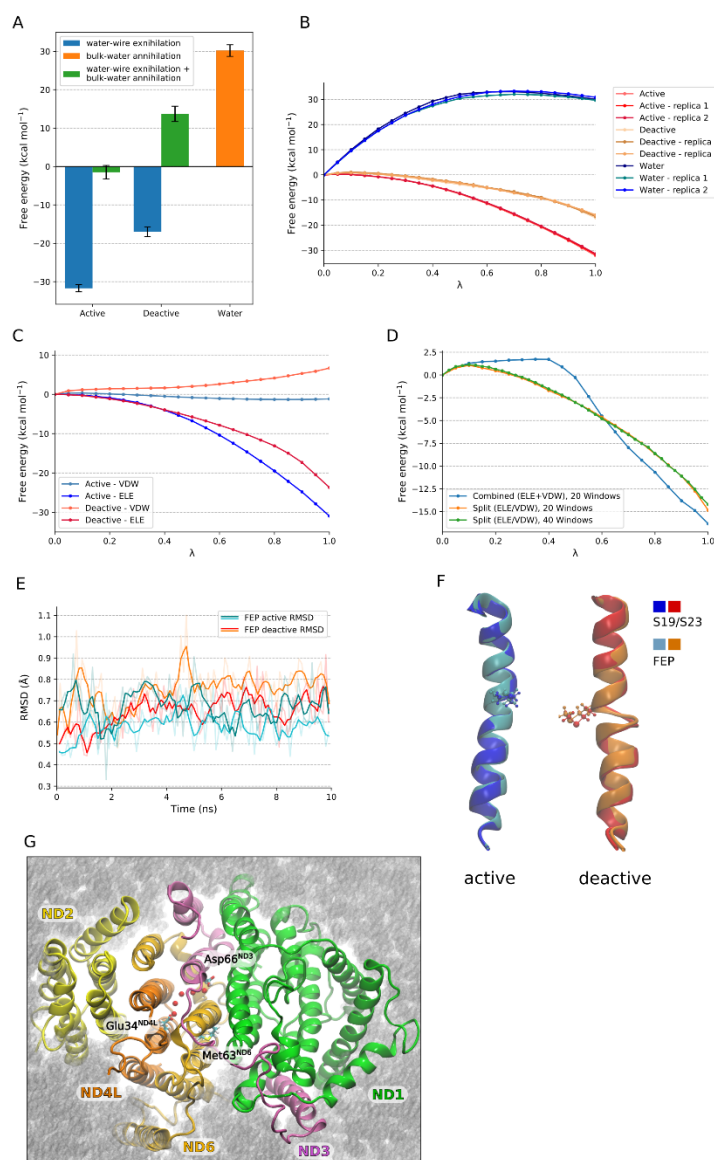

**Fig. S7. Free energy perturbation (FEP) calculations.** **A**, Free energy for introduction of a water wire (*exnihilation*) in the ND3/ND4L/ND6 region in the *active* and *deactive* states, and water removal (*annihilation*) from the bulk, using alchemical FEP. **B**, Free energy profiles from  $\lambda=0$  (fully decoupled) to  $\lambda=1$  (fully coupled) for all replicas. Note that intermediate  $\lambda$  values represent unphysical states. **C**, Decomposition of the free energy into vdW and electrostatic contributions. **D**, Benchmarking simulations to probe the effect of splitting the vdW and electrostatic coupling/decoupling into separate simulations and the dependence on number of sampling windows. The benchmarking calculations were performed on the *deactive* state model. **E**, Backbone RMSD of TM3-ND6 for the *active* and *deactive* FEP simulations ( $\lambda=1$ ). The RMSD of each simulation is relative to the first frame and calculated by aligning the whole ND6 subunit, indicating small local rearrangement within the TM3<sup>ND6</sup> region. **F**, Comparison of the last snapshot of the *active* and *deactive* state FEP simulations (pale colors) with the last snapshots from simulations S19 and S23 (dark colors), respectively. TM3<sup>ND6</sup> shows small conformational changes, whereas larger conformational changes could be limited by the FEP simulations timescale.



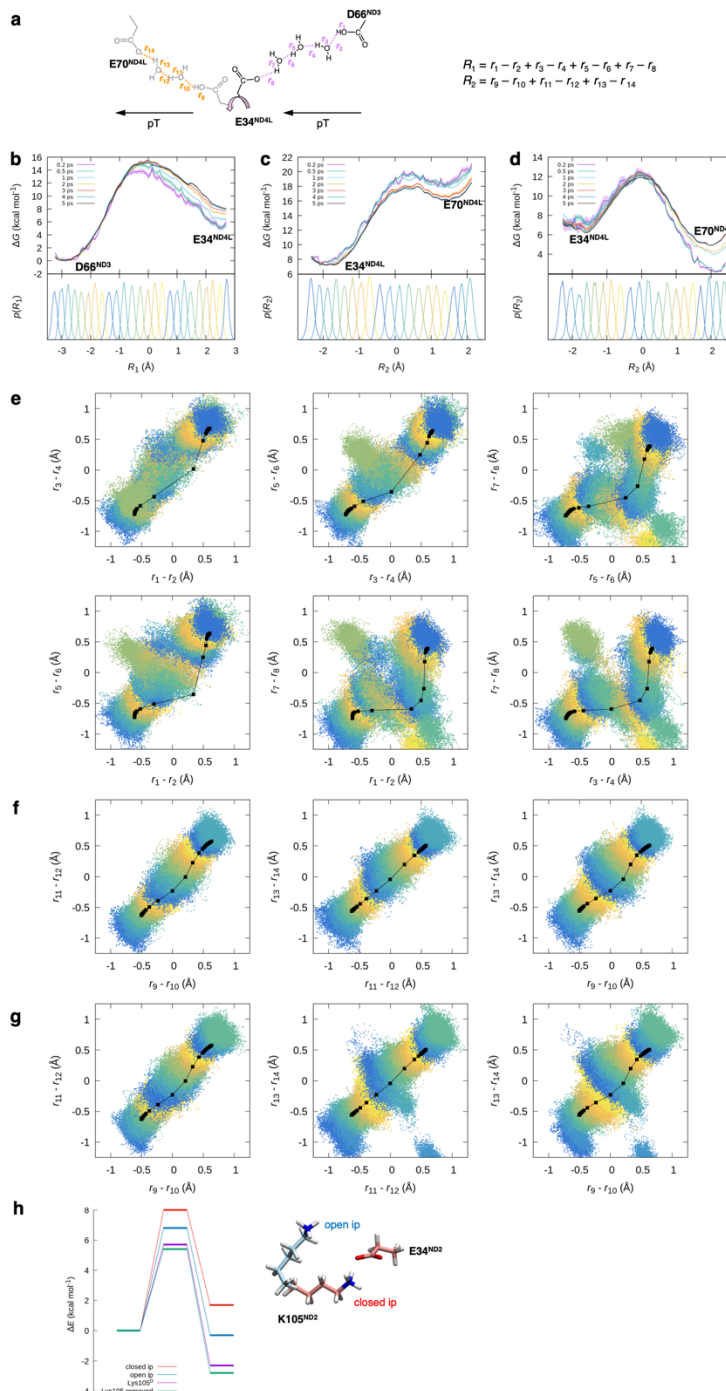

**Fig. S8. Convergence of hybrid QM/MM free energy calculations and sampling of reaction coordinates.** **A**, definition of reaction coordinates  $R_1$  and  $R_2$  used in the QM/MM umbrella sampling (US) simulations. **B**, **C**, **D**, convergence of QM/MM US calculations and overlap of reaction coordinates in the individual simulations. **E**, **F**, **G**, Sampled proton transfer distances in the QM/MM US simulations during the respective simulations shown in **B**-**D**, suggesting that the proton is transferred in a Grotthuss-type transfer mechanism (sampling along the diagonal). Results from DFT reaction pathway optimizations are shown as black dots. **H**, effect of modeling ND2 ion-pair opening in the DFT cluster models by conformational and/or protonation changes.

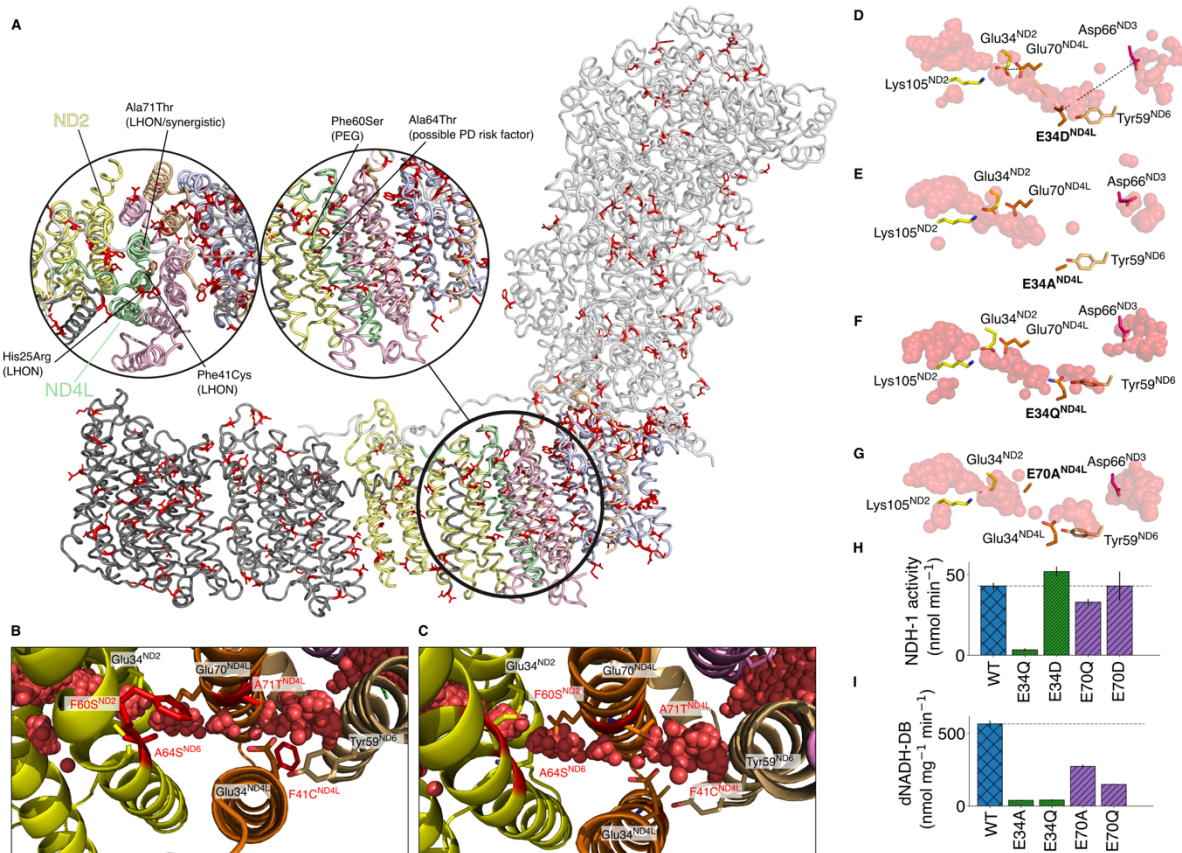

**Fig. S9. Disease related mutations in the mitochondrial complex I.** **A**, location of mitochondrial disease related mutations (residues marked in red) (22). **B**, Closeup of disease related mutations near the proton pathway at the ND3/ND4L/ND6 interface, and **C**, *in silico* models of the mutations. Introduced substitutions form contacts with water molecules or proton donor/acceptor groups within the wire. F41C<sup>ND4L</sup> could lead to a formation of a disulfide bridge with Cys40<sup>ND6</sup>, the backbone of which is located <10 Å in the wild type structure. See also Table S6. **D-G**, introduced single point mutations: **D**, E34D<sup>ND4L</sup>, **E**, E34A<sup>ND4L</sup>, **F**, E34Q<sup>ND4L</sup>, **G**, E70A<sup>ND4L</sup> perturb the proton pathways at the ND6/ND4L interface. **H**, **I**, effect of single point mutations of key residues on complex I activity. The experimental data was obtained from Refs. (23,24).

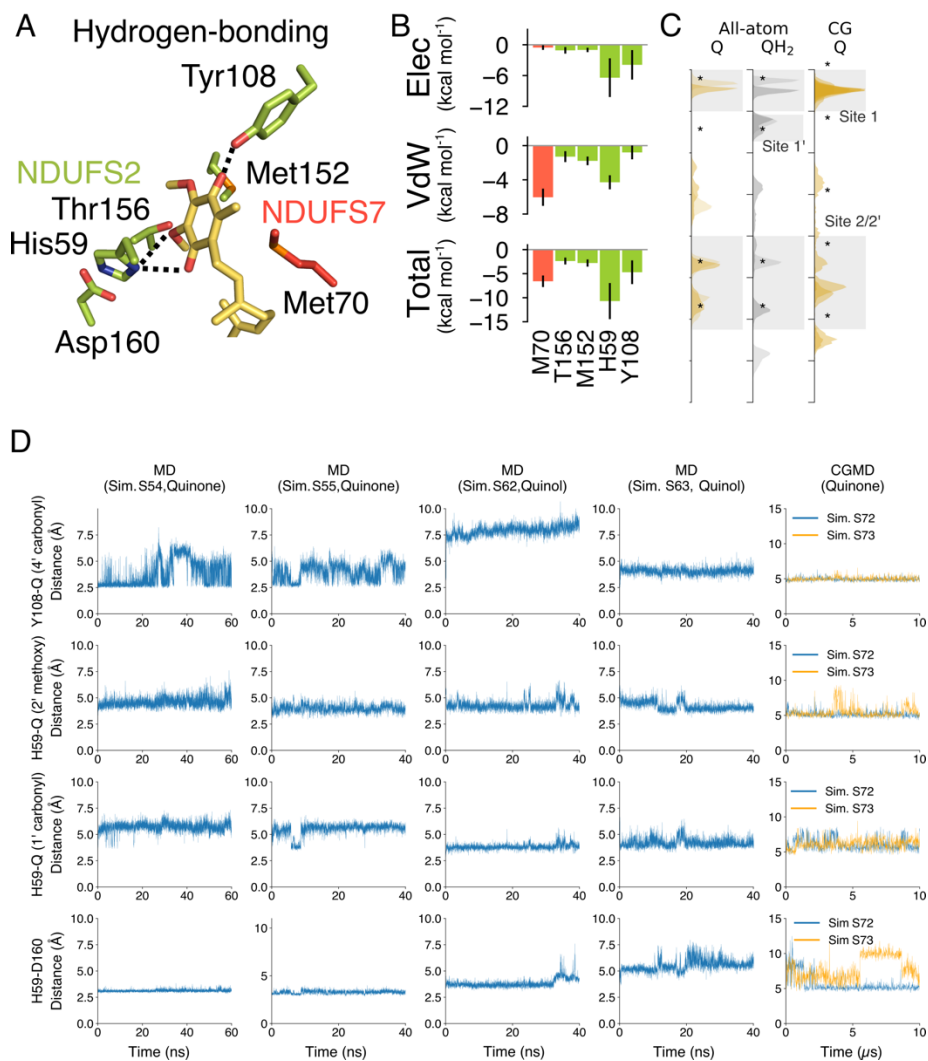

**Fig. S10. Q<sub>10</sub> dynamics explored by atomistic and coarse-grained MD.** **A**, hydrogen-bonding binding mode, with the Q headgroup forming contacts with Tyr108<sup>NDUFS2</sup> and His59<sup>NDUFS2</sup>. **B**, interaction energy decomposition of the binding energy contributions (in kcal mol<sup>-1</sup>). **C**, Distribution of Q<sub>10</sub>-Tyr108<sup>NDUFS2</sup> distances explored from classical (simulations S62-S77) and coarse-grained MD simulations (simulations S78-S87). The Q starting positions in the simulations are indicated with an asterisk. **D**, Dynamics of Q<sub>10</sub> explored in independent MD (in blue, simulations S62, S53, S70, S71) and CGMD (simulations S78, S79) trajectories.

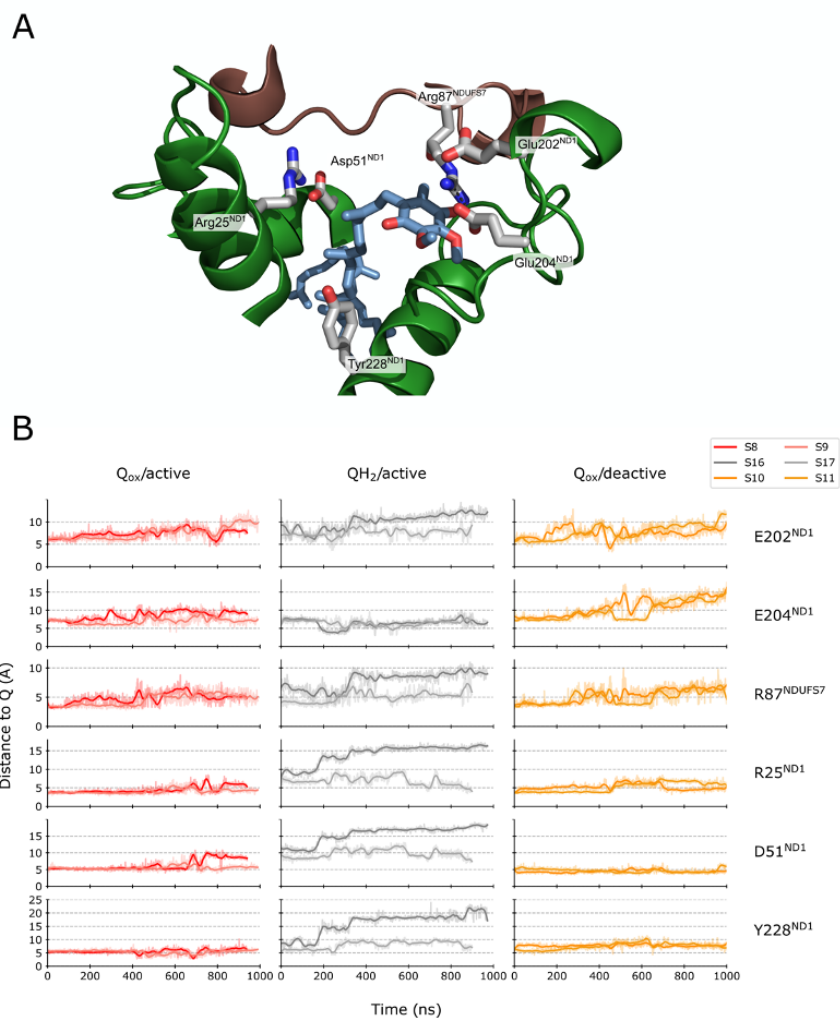

**Fig. S11.** Dynamics of Q<sub>10</sub> in the membrane-bound binding region. **A**, Selection of key residues that form contact with Q<sub>10</sub> during the *active/deactive* state simulations **B**, Distance plot between Q/QH<sub>2</sub> and the selected residues. The distances were measured from Glu(CD)/Asp(CG)/Arg(CZ)/Tyr(OH) to the closest carbonyl oxygen of Q<sub>10</sub>.

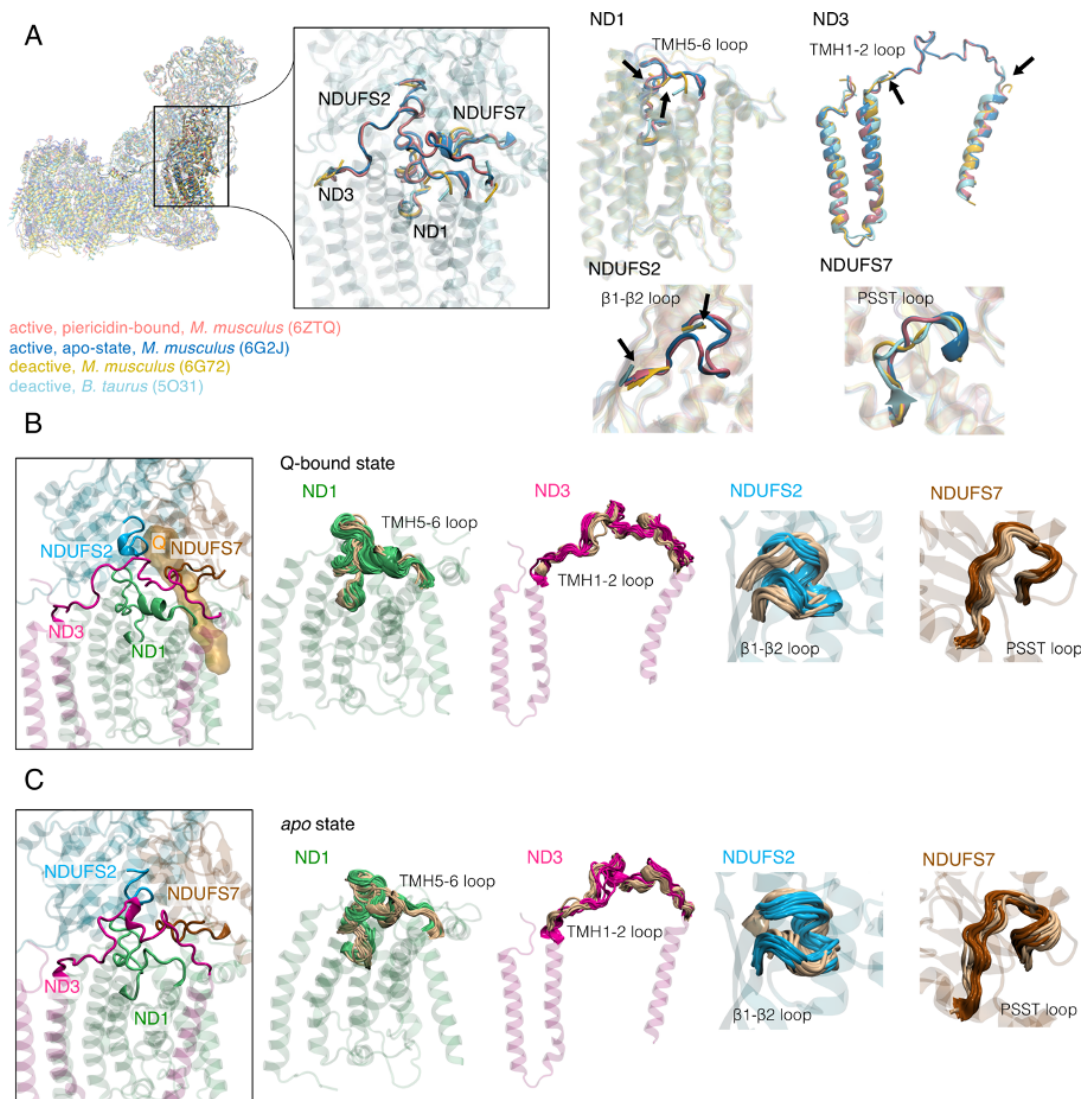

**Fig. S12. Conformational changes around the Q tunnel linked to the A/D transition. A,** unresolved loop regions/structural differences in cryoEM structures around ND1, ND3, NDUFS2, and NDUFS7 of the mammalian complex I (marked with arrows). **B, C,** Conformational dynamics around ND1, ND3, NDUFS2, and NDUFS7 in the *active* (subunit specific color) and the *deactive* (light brown) states MD simulations, with **B,** showing the Q-bound simulations (simulation S1/S6, Table S1), and **C,** showing the *apo*-state simulations (simulation S12, S14, Table S1).



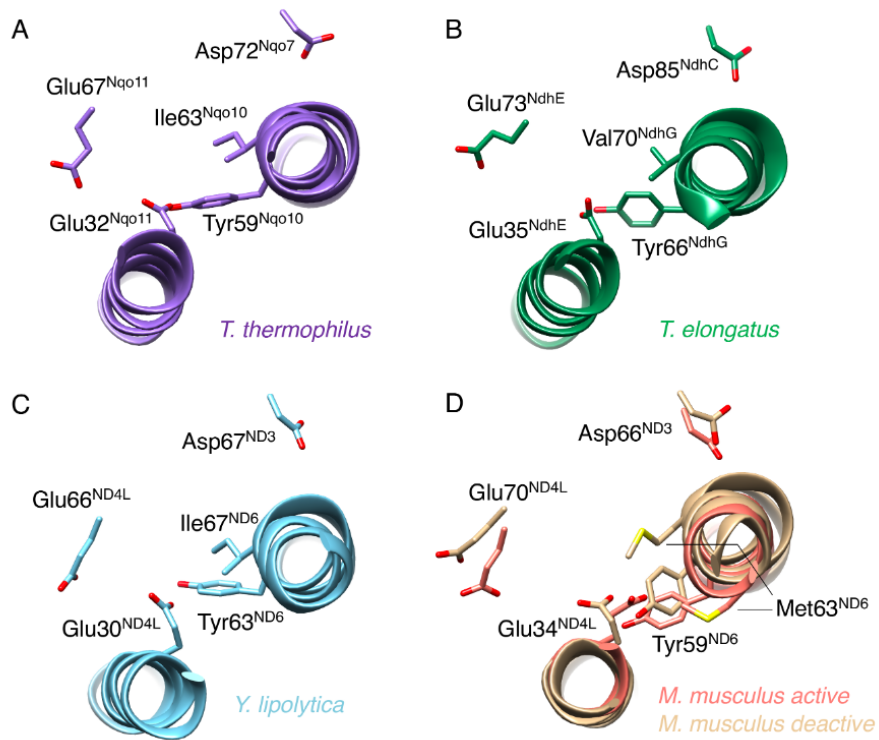

**Fig. S13. Conformational changes around TM3<sup>ND3/ND6</sup> and the ND3/ND4L/ND6 gating region** in **A**, *Thermus thermophilus* (purple, Nqo11/Nqo10, PDB ID: 4HEA(17)), **B**, *Thermosynechococcus elongatus* (green, NdhE/NdhG, PDB ID: 6TJV (18)), **C**, *Yarrowia lipolytica* (blue, ND4L/ND6, PDB ID: 6RFR (19)), and **D**, mouse complex I *active* (red) and *deactive* (pale) models derived in this study.



**Table S1.** Overview of classical MD simulations.

| Simulation | State    | Length       | Starting point                            | Comment                    |
|------------|----------|--------------|-------------------------------------------|----------------------------|
| S1         | active   | 1000 ns      | CryoEM after equilibration                | Q site 1                   |
| S2         | active   | 500 ns       | CryoEM after equilibration                | Q site 1                   |
| S3         | -        | 200 steps    | CryoEM structure active<br>+ map deactive | MDFF-pre<br>minimization   |
| S4         | -        | 50,000 steps | S3                                        | MDFF run                   |
| S5         | deactive | 2000 steps   | S4                                        | MDFF post-<br>minimization |
| S6         | deactive | 1000 ns      | S5                                        | Q site 1                   |
| S7         | deactive | 670 ns       | S5                                        | Q site 1                   |
| S8         | active   | 1000 ns      | CryoEM after equilibration                | Q site 2                   |
| S9         | active   | 1000 ns      | CryoEM after equilibration                | Q site 2                   |
| S10        | deactive | 1000ns       | S5                                        | Q site 2                   |
| S11        | deactive | 1000ns       | S5                                        | Q site 2                   |
| S12        | active   | 1000 ns      | CryoEM after equilibration                | <i>apo</i> -state          |
| S13        | active   | 1000 ns      | CryoEM after equilibration                | <i>apo</i> -state          |
| S14        | deactive | 1000 ns      | S5                                        | <i>apo</i> -state          |
| S15        | deactive | 1000 ns      | S5                                        | <i>apo</i> -state          |
| S16        | active   | 1000 ns      | CryoEM after equilibration                | QH <sub>2</sub> site 2     |
| S17        | active   | 1000 ns      | CryoEM after equilibration                | QH <sub>2</sub> site 2     |

| Simulation | State    | Length/Steps | Starting point | Comment<br>D66 <sup>ND3</sup> /E34 <sup>ND4L</sup> /<br>E70 <sup>ND4L</sup> |
|------------|----------|--------------|----------------|-----------------------------------------------------------------------------|
| S18        | active   | 100 ns       | S1             | DDD                                                                         |
| S19        | active   | 100 ns       | S18            | PDD                                                                         |
| S20        | active   | 100 ns       | S19            | DPD                                                                         |
| S21        | active   | 100 ns       | S20            | DDP                                                                         |
| S22        | deactive | 100 ns       | S6             | DDD                                                                         |
| S23        | deactive | 100 ns       | S22            | PDD                                                                         |
| S24        | deactive | 100 ns       | S23            | DPD                                                                         |
| S25        | deactive | 100 ns       | S24            | DDP                                                                         |

| Simulation | State    | Length/Steps | Starting point  | Comment |
|------------|----------|--------------|-----------------|---------|
| S26        | active   | 10 ns        | S1 after 962 ns | A64S    |
| S27        | active   | 10 ns        | S1 after 962 ns | A71T    |
| S28        | active   | 10 ns        | S1 after 962 ns | E34A    |
| S29        | active   | 10 ns        | S1 after 962 ns | E34D    |
| S30        | active   | 10 ns        | S1 after 962 ns | E34Q    |
| S31        | active   | 10 ns        | S1 after 962 ns | E70A    |
| S32        | active   | 10 ns        | S1 after 962 ns | E70Q    |
| S33        | active   | 10 ns        | S1 after 962 ns | F41C    |
| S34        | active   | 10 ns        | S1 after 962 ns | F60S    |
| S35        | active   | 10 ns        | S1 after 990 ns | A64S    |
| S36        | active   | 10 ns        | S1 after 990 ns | A71T    |
| S37        | active   | 10 ns        | S1 after 990 ns | E34A    |
| S38        | active   | 10 ns        | S1 after 990 ns | E34D    |
| S39        | active   | 10 ns        | S1 after 990 ns | E34Q    |
| S40        | active   | 10 ns        | S1 after 990 ns | E70A    |
| S41        | active   | 10 ns        | S1 after 990 ns | E70Q    |
| S42        | active   | 10 ns        | S1 after 990 ns | F41C    |
| S43        | active   | 10 ns        | S1 after 990 ns | F60S    |
| S44        | deactive | 10 ns        | S6 after 746 ns | A64S    |
| S45        | deactive | 10 ns        | S6 after 746 ns | A71T    |
| S46        | deactive | 10 ns        | S6 after 746 ns | E34A    |
| S47        | deactive | 10 ns        | S6 after 746 ns | E34D    |
| S48        | deactive | 10 ns        | S6 after 746 ns | E34Q    |
| S49        | deactive | 10 ns        | S6 after 746 ns | E70A    |
| S50        | deactive | 10 ns        | S6 after 746 ns | E70Q    |
| S51        | deactive | 10 ns        | S6 after 746 ns | F41C    |
| S52        | deactive | 10 ns        | S6 after 746 ns | F60S    |
| S53        | deactive | 10 ns        | S6 after 981 ns | A64S    |
| S54        | deactive | 10 ns        | S6 after 981 ns | A71T    |
| S55        | deactive | 10 ns        | S6 after 981 ns | E34A    |
| S56        | deactive | 10 ns        | S6 after 981 ns | E34D    |

|     |          |       |                 |      |
|-----|----------|-------|-----------------|------|
| S57 | deactive | 10 ns | S6 after 981 ns | E34Q |
| S58 | deactive | 10 ns | S6 after 981 ns | E70A |
| S59 | deactive | 10 ns | S6 after 981 ns | E70Q |
| S60 | deactive | 10 ns | S6 after 981 ns | F41C |
| S61 | deactive | 10 ns | S6 after 981 ns | F60S |

| Simulation | State                   | Length/Steps                         | Starting point            | Comment       |
|------------|-------------------------|--------------------------------------|---------------------------|---------------|
| S62        | Q/active                | 60 ns                                | Resolved piericidin model | Q site 1      |
| S63        | Q/active                | 40 ns                                | Resolved piericidin model | Q site 1      |
| S64        | Q/active                | 40 ns                                | Docked Q based on Ref. 5  | Q site 1'     |
| S65        | Q/active                | 40 ns                                | Docked Q based on Ref. 5  | Q site 1'     |
| S66        | Q/active                | 40 ns                                | Docked Q based on Ref. 5  | Q site 2      |
| S67        | Q/active                | 40 ns                                | Docked Q based on Ref. 5  | Q site 2      |
| S68        | Q/active                | 40 ns                                | Docked Q based on Ref. 5  | Q site 2'     |
| S69        | Q/active                | 40 ns                                | Docked Q based on Ref. 5  | Q site 2'     |
| S70        | QH <sub>2</sub> /active | 40 ns                                | Docked Q based on Ref. 5  | Q site 1      |
| S71        | QH <sub>2</sub> /active | 40 ns                                | Docked Q based on Ref. 5  | Q site 1      |
| S72        | QH <sub>2</sub> /active | 40 ns                                | Docked Q based on Ref. 5  | Q site 1'     |
| S73        | QH <sub>2</sub> /active | 40 ns                                | Docked Q based on Ref. 5  | Q site 1'     |
| S74        | QH <sub>2</sub> /active | 40 ns                                | Docked Q based on Ref. 5  | Q site 2      |
| S75        | QH <sub>2</sub> /active | 40 ns                                | Docked Q based on Ref. 5  | Q site 2      |
| S76        | QH <sub>2</sub> /active | 40 ns                                | Docked Q based on Ref. 5  | Q site 2'     |
| S77        | QH <sub>2</sub> /active | 40 ns                                | Docked Q based on Ref. 5  | Q site 2'     |
| S78        | Q/active CGMD           | 10 000 ns                            | Docked Q based on Ref. 5  | Q site 1      |
| S79        | Q/active CGMD           | 10 000 ns                            | Docked Q based on Ref. 5  | Q site 1      |
| S80        | Q/active CGMD           | 10 000 ns                            | Docked Q based on Ref. 5  | Q site 1'     |
| S81        | Q/active CGMD           | 10 000 ns                            | Docked Q based on Ref. 5  | Q site 1'     |
| S82        | Q/active CGMD           | 10 000 ns                            | Docked Q based on Ref. 5  | Q site 2      |
| S83        | Q/active CGMD           | 10 000 ns                            | Docked Q based on Ref. 5  | Q site 2      |
| S84        | Q/active CGMD           | 10 000 ns                            | Docked Q based on Ref. 5  | Q site 2'     |
| S85        | Q/active CGMD           | 10 000 ns                            | Docked Q based on Ref. 5  | Q site 2'     |
| S86        | Q/active CGMD           | 10 000 ns                            | Docked Q based on Ref. 5  | Q site 2'/out |
| S87        | Q/active CGMD           | 10 000 ns                            | Docked Q based on Ref. 5  | Q site 2'/out |
|            | <b>Total:</b>           | 14 985 ns (MD)<br>100 $\mu$ s (CGMD) |                           |               |

**Table S2.** Non-standard protonation states determined based on PBE/MC calculations (see main text *Methods*). HSE –  $\epsilon$ -protonated (neutral) His, HSD -  $\delta$ -protonated (neutral) His, HSP –  $\epsilon/\delta$ -protonated (charged) His.

| Simulation                    | Residues                                                                                                      | Subunit         |
|-------------------------------|---------------------------------------------------------------------------------------------------------------|-----------------|
| S1-S17, S26-S61               | His19(HSP), His53(HSE), His67(HSE), His124(HSE), His160(HSE)                                                  | NDUFS3          |
|                               | His43(HSE), His421(HSE), His437(HSE), His494(HSE), His549(HSE)                                                | NDUFS1          |
|                               | His59(HSP), His190(HSP), His27(HSE), His55(HSE), His150(HSE), His200(HSE), His348(HSE), His398(HSE)           | NDUFS2          |
|                               | His42(HSE), His99(HSE)                                                                                        | NDUFV2          |
|                               | His 261(HSP)                                                                                                  | NDUFV1          |
|                               | His67(HSP), His146(HSP)                                                                                       | NDUFS8          |
|                               | His213(HSP), His338(HSP), His170(HSE), His184(HSE), His422(HSE), His430(HSE), His440(HSE)                     | ND4             |
|                               | Glu34, Glu70                                                                                                  | ND4L            |
|                               | His50 (HSP), His190(HSP)                                                                                      | NDUFB7          |
|                               | His111(HSP)                                                                                                   | NDUFA6          |
|                               | Asp26, His35(HSE)                                                                                             | NDUFAB1 $\beta$ |
|                               | His93(HSE), His171(HSE), His287(HSE), Glu262, Glu143                                                          | ND1             |
|                               | His29(HSE), His109(HSE), His534(HSE)                                                                          | ND5             |
|                               | Asp66                                                                                                         | ND3             |
|                               | His316(HSE)                                                                                                   | ND2             |
|                               | His114(HSE), His151(HSE), His167(HSE), His257(HSE)                                                            | NDUFA10         |
|                               | His2(HSE), His3(HSE), His58(HSE), His87(HSE), His131(HSE), His134(HSE), His240(HSE), His250(HSE), His321(HSE) | NDUFA9          |
|                               | His29(HSE)                                                                                                    | NDUFS4          |
|                               | His13(HSE), His54(HSE)                                                                                        | NDUFS6          |
|                               | His22(HSE)                                                                                                    | NDUFV3          |
|                               | His21(HSE), His41(HSE)                                                                                        | NDUFA5          |
|                               | His75(HSE), His105(HSE), His129(HSE)                                                                          | NDUFA6          |
|                               | His30(HSE), His31(HSE), His99(HSE), His163(HSE)                                                               | NDUFA8          |
|                               | His21(HSE), His108(HSE)                                                                                       | NDUFA11         |
|                               | His27(HSE)                                                                                                    | NDUFA1          |
|                               | His59(HSE), His117(HSE)                                                                                       | NDUFC2          |
|                               | His45(HSE), His97(HSE), His98(HSE)                                                                            | NDUFS5          |
|                               | His9(HSE), His12(HSE)                                                                                         | NDUFB1          |
|                               | His135(HSE)                                                                                                   | NDUFB5          |
|                               | His82(HSE), His88(HSE)                                                                                        | NDUFB6          |
|                               | His84(HSE), His94(HSE), His148(HSE)                                                                           | NDUFB8          |
|                               | His59(HSE)                                                                                                    | NDUFB4          |
|                               | His12(HSE), His76(HSE), His169(HSE)                                                                           | NDUFB9          |
|                               | His60(HSE), His91(HSE)                                                                                        | NDUFB7          |
|                               | His55(HSE), His64(HSE)                                                                                        | NDUFB10         |
|                               | His17(HSE), His87(HSE)                                                                                        | NDUFA12         |
|                               | His38(HSE)                                                                                                    | NDUFV3          |
| S18, S22<br>(as in S1 except) | Lys135                                                                                                        | ND2             |

|                               |                        |      |
|-------------------------------|------------------------|------|
|                               | Lys237, Glu378         | ND4  |
|                               | Lys336, Lys392, Asp393 | ND5  |
|                               | Glu66                  | ND3  |
|                               | Glu34                  | ND4L |
| S19, S23<br>(as in S1 except) | Glu34, Lys135          | ND2  |
|                               | Lys237, Glu123         | ND4  |
|                               | Lys336, Glu145         | ND5  |
| S20, S24<br>(as in S1 except) | Glu143                 | ND1  |
|                               | Glu34, Glu70           | ND4L |
| S21, S25<br>(as in S1 except) | Glu34, Glu70           | ND4L |

**Table S3. Secondary structure restraints used for modeling the D state during MDFF.**

| Subunit | Residues                                                                                                                                                                                                                                                                                                                                          | Strength (kcal mol <sup>-1</sup> rad <sup>-2</sup> ) |
|---------|---------------------------------------------------------------------------------------------------------------------------------------------------------------------------------------------------------------------------------------------------------------------------------------------------------------------------------------------------|------------------------------------------------------|
| ND3     | 1-25, 30-34, 54-78, 84-109                                                                                                                                                                                                                                                                                                                        | 200                                                  |
| NDUFV2  | 24-38, 42-59, 62-74, 76-87, 97-125, 136-143, 153-163, 165-179, 184-187                                                                                                                                                                                                                                                                            | 200                                                  |
| NDUFV1  | 32-38, 44-64, 76-80, 91-96, 105-112, 114-130, 132-139, 142-160, 173-180, 183-198, 214-236, 238-260, 265-283, 290-299, 315-326, 332-338, 342-358, 362-382, 385-402, 405-436                                                                                                                                                                        | 200                                                  |
| NDUFS7  | 35-54, 63-74, 78-83, 94-100, 104-117, 121-137, 145-149, 153-157, 162-179, 181-189                                                                                                                                                                                                                                                                 | 200                                                  |
| NDUFS1  | 8-21, 25-34, 55-60, 65-68, 76-81, 83-100, 114-124, 145-149, 157-167, 172-176, 181-185, 195-203, 207-211, 218-229, 236-253, 264-274, 282-286, 290-320, 324-338, 342-346, 358-362, 367-373, 375-381, 388-402, 404-410, 426-435, 437-446, 448-481, 491-494, 496-517, 520-523, 541-548, 558-563, 570-575, 579-584, 595-607, 615-632, 641-652, 675-693 | 200                                                  |
| ND1     | 1-33, 45-57, 67-86, 99-123, 125-156, 161-170, 177-192, 217-243, 251-277, 281-312                                                                                                                                                                                                                                                                  | 200                                                  |
| NDUFS8  | 15-25, 29-45, 65-70, 83-89, 93-101, 105-115, 122-128, 132-137, 146-175                                                                                                                                                                                                                                                                            | 200                                                  |
| ND6     | 2-22, 24-74, 85-109, 140-146, 148-171                                                                                                                                                                                                                                                                                                             | 200                                                  |
| NDUFS3  | 15-33, 36-44, 46-53, 55-67, 73-83, 89-98, 103-112, 116-119, 125-139, 141-144, 171-175, 184-188, 206-210                                                                                                                                                                                                                                           | 200                                                  |
| ND4L    | 1-21, 25-86                                                                                                                                                                                                                                                                                                                                       | 200                                                  |
| ND5     | 1-23, 31-58, 61-105, 112-134, 136-157, 162-194, 197-203, 209-224, 226-267, 270-293, 297-319, 321-350, 366-381, 387-402, 405-433, 447-472, 483-509, 517-579, 583-606                                                                                                                                                                               | 200                                                  |
| ND4     | 1-18, 21-40, 49-81, 88-112, 114-137, 140-172, 189-223, 225-249, 252-278, 281-338, 352-367, 372-414, 430-450                                                                                                                                                                                                                                       | 200                                                  |
| ND2     | 2-23, 25-46, 49-80, 91-107, 112-145, 150-171, 174-194, 197-222, 226-236, 239-253, 258-301, 309-317, 324-332, 336-343                                                                                                                                                                                                                              | 200                                                  |
| NDUFA10 | 4-11, 14-18, 23-29, 34-52, 78-85, 91-119, 121-126, 130-141, 145-159, 167-173, 175-187, 195-224, 230-241, 247-274, 285-299, 316-320                                                                                                                                                                                                                | 200                                                  |
| NDUFA9  | 2-6, 20-24, 28-42, 44-50, 56-60, 67-73, 79-87, 89-94, 105-125, 127-133, 143-160, 162-173, 178-185, 190-197, 200-220, 226-231, 234-249, 254-272, 280-289, 309-322, 338-341                                                                                                                                                                         | 200                                                  |
| NDUFS2  | 7-14, 22-26, 47-51, 64-78, 86-94, 96-100, 102-106, 111-127, 131-185, 206-229, 232-239, 246-254, 256-264, 268-273, 277-281, 292-318, 336-355, 360-381, 385-421, 424-430                                                                                                                                                                            | 200                                                  |
| NDUFS4  | 26-30, 33-39, 54-60, 63-67, 72-76, 82-107, 119-123                                                                                                                                                                                                                                                                                                | 200                                                  |

|                  |                                                |     |
|------------------|------------------------------------------------|-----|
| NDUFS6           | 25-29, 39-47, 49-53, 55-60, 70-75,81-84, 89-94 | 200 |
| NDUFA2           | 1-171                                          | 200 |
| NDUFAB1 $\alpha$ | 7-23, 43-58, 64-70, 72-82                      | 200 |
| NDUFAB1 $\beta$  | 7-21, 35-41, 43-59, 63-67, 72-85               | 200 |
| NDUFA5           | 21-37, 42-62, 64-72, 76-98                     | 200 |
| NDUFA6           | 27-53, 58-73, 78-98, 102-111, 120-127          | 200 |
| NDUFA8           | 21-50, 52-92, 97-114                           | 200 |
| NDUFA11          | 4-13, 19-44, 50-82, 88-107, 109-134            | 200 |
| NDUFA13          | 32-99, 129-137                                 | 200 |

Additional restraints centered on the MDFF setup, for modeling the D state.

| Subunit | Residues | Atoms    | Strength<br>(kcal mol <sup>-1</sup> Å <sup>-1</sup> ) |
|---------|----------|----------|-------------------------------------------------------|
| ND6     | 65-90    | backbone | 70                                                    |
|         | 67, 69   | CB, CZ   | 70                                                    |
|         | 64       | CG       | 70                                                    |
| ND3     | 52-58    | backbone | 70                                                    |



**Table S4.** Overview of QM/MM MD and QM/MM free energy simulations. QM/MM model 1 – QM region shown in Fig. S1C; QM/MM model 2 – QM region in Fig. S1B. QM models 3-5 were constructed from QM models 1-2 for the DFT benchmarking (see SI Methods).

| Simulation | State                                                   | Length               | Starting point | Comment                                                         |
|------------|---------------------------------------------------------|----------------------|----------------|-----------------------------------------------------------------|
| S88        | QH <sub>2</sub>                                         | 2.5 ps               | QM/MM model 1  | Q site 2/ $N_{QM}$ = 208                                        |
| S89        | QH <sub>2</sub>                                         | 2.5 ps               |                | Q site 2/ $N_{QM}$ = 208                                        |
| S90        | pT from Asp66 <sup>ND3</sup><br>→Glu34 <sup>ND4L</sup>  | 25 x 5 ps = 125 ps   | QM/MM model 2  | $N_{QM}$ = 139                                                  |
| S91        | pT from Glu34 <sup>ND4L</sup><br>→Glu70 <sup>ND4L</sup> | 19 x 5 ps = 95 ps    | QM/MM model 3  | Glu/Lys <sup>+</sup> ( <sup>ND2</sup> ) closed<br>$N_{QM}$ = 90 |
| S92        | pT from Glu34 <sup>ND4L</sup><br>→Glu70 <sup>ND4L</sup> | 19 x 5 ps = 95 ps    |                | Glu/Lys <sup>0</sup> ( <sup>ND2</sup> ) open<br>$N_{QM}$ = 90   |
|            |                                                         | <b>Total: 320 ps</b> |                |                                                                 |

| Model                           | Residues in QM region                                                                                                                                                                                                                                                                                                                                                                                                                                                                                                                                                                                                                                                                                                                                                      |
|---------------------------------|----------------------------------------------------------------------------------------------------------------------------------------------------------------------------------------------------------------------------------------------------------------------------------------------------------------------------------------------------------------------------------------------------------------------------------------------------------------------------------------------------------------------------------------------------------------------------------------------------------------------------------------------------------------------------------------------------------------------------------------------------------------------------|
| QM/MM model 1 ( $N$ =208 atoms) | Glu24 <sup>ND1</sup> (protonated), Arg195 <sup>ND1</sup> , Asp199 <sup>ND1</sup> , Glu202 <sup>ND1</sup> , Glu204 <sup>ND1</sup> , Ser209 <sup>ND1</sup> , Arg274 <sup>ND1</sup> , Phe224 <sup>ND1</sup> , Glu227 <sup>ND1</sup> , Tyr228 <sup>ND1</sup> , Arg279 <sup>ND1</sup> , Gln92 <sup>NDUF57</sup> , Arg87 <sup>NDUF57</sup> , QH <sub>2</sub> /QH; 9 H <sub>2</sub> O                                                                                                                                                                                                                                                                                                                                                                                             |
| QM/MM model 2 ( $N$ =139 atoms) | Asp66 <sup>ND3</sup> , Glu34 <sup>ND4L</sup> , Tyr59 <sup>ND6</sup> , Phe62 <sup>ND3</sup> , Leu63 <sup>ND3</sup> , Leu32 <sup>ND6</sup> , Leu57 <sup>ND6</sup> , Ile58 <sup>ND6</sup> , Val37 <sup>ND4L</sup> , Ala71 <sup>ND4L</sup> , 6 H <sub>2</sub> O                                                                                                                                                                                                                                                                                                                                                                                                                                                                                                                |
| QM/MM model 3 ( $N$ =90 atoms)  | Glu34 <sup>ND4L</sup> , Glu70 <sup>ND4L</sup> , Tyr59 <sup>ND6</sup> , Ala71 <sup>ND4L</sup> , Val37 <sup>ND4L</sup> , Ala67 <sup>ND4L</sup> , Met68 <sup>ND2</sup> , Ala64 <sup>ND2</sup> , Ser67 <sup>ND2</sup> , 3 H <sub>2</sub> O                                                                                                                                                                                                                                                                                                                                                                                                                                                                                                                                     |
| DFT model 1 ( $N$ =250 atoms)   | Asp66 <sup>ND3</sup> , Glu34 <sup>ND4L</sup> , Tyr59 <sup>ND6</sup> , Phe62 <sup>ND3</sup> , Leu63 <sup>ND3</sup> , Leu67 <sup>ND3</sup> , Leu32 <sup>ND6</sup> , Leu57 <sup>ND6</sup> , Ile58 <sup>ND6</sup> , Met63 <sup>ND6</sup> , Leu30 <sup>ND4L</sup> , Leu31 <sup>ND4L</sup> , Val37 <sup>ND4L</sup> , Leu38 <sup>ND4L</sup> , Ala71 <sup>ND4L</sup> , Leu75 <sup>ND4L</sup> , Leu106 <sup>ND2</sup> , 8 H <sub>2</sub> O                                                                                                                                                                                                                                                                                                                                          |
| DFT model 2 ( $N$ =190 atoms)   | Glu34 <sup>ND4L</sup> , Glu70 <sup>ND4L</sup> , Glu34 <sup>ND2</sup> , Lys105 <sup>ND2</sup> , Tyr59 <sup>ND6</sup> , Leu33 <sup>ND4L</sup> , Val37 <sup>ND4L</sup> , Ala67 <sup>ND4L</sup> , Ala71 <sup>ND4L</sup> , Leu37 <sup>ND2</sup> , Leu38 <sup>ND2</sup> , Gln63 <sup>ND2</sup> , Ala64 <sup>ND2</sup> , Ser67 <sup>ND2</sup> , Met68 <sup>ND2</sup> , 7 H <sub>2</sub> O                                                                                                                                                                                                                                                                                                                                                                                         |
| DFT model 3 ( $N$ =381 atoms)   | Asp66 <sup>ND3</sup> , Glu34 <sup>ND4L</sup> , Tyr59 <sup>ND6</sup> , Phe62 <sup>ND3</sup> , Leu63 <sup>ND3</sup> , Leu67 <sup>ND3</sup> , Leu32 <sup>ND6</sup> , Leu57 <sup>ND6</sup> , Ile58 <sup>ND6</sup> , Met63 <sup>ND6</sup> , Leu30 <sup>ND4L</sup> , Leu31 <sup>ND4L</sup> , Val37 <sup>ND4L</sup> , Leu38 <sup>ND4L</sup> , Ala71 <sup>ND4L</sup> , Leu75 <sup>ND4L</sup> , Leu106 <sup>ND2</sup> , Glu70 <sup>ND4L</sup> , Glu34 <sup>ND2</sup> , Lys105 <sup>ND2</sup> , Tyr59 <sup>ND6</sup> , Leu33 <sup>ND4L</sup> , Val37 <sup>ND4L</sup> , Ala67 <sup>ND4L</sup> , Ala71 <sup>ND4L</sup> , Leu37 <sup>ND2</sup> , Leu38 <sup>ND2</sup> , Gln63 <sup>ND2</sup> , Ala64 <sup>ND2</sup> , Ser67 <sup>ND2</sup> , Met68 <sup>ND2</sup> , 15 H <sub>2</sub> O |
| DFT model 4 ( $N$ =131 atoms)   | Asp66 <sup>ND3</sup> , Glu34 <sup>ND4L</sup> , Tyr59 <sup>ND6</sup> , Phe62 <sup>ND3</sup> , Leu63 <sup>ND3</sup> , Leu67 <sup>ND3</sup> , Leu32 <sup>ND6</sup> , Ala71 <sup>ND4L</sup> , Ile58 <sup>ND6</sup> , 7 H <sub>2</sub> O                                                                                                                                                                                                                                                                                                                                                                                                                                                                                                                                        |
| DFT model 5 ( $N$ =27 atoms)    | Asp66 <sup>ND3</sup> , Glu34 <sup>ND4L</sup> , 3 H <sub>2</sub> O                                                                                                                                                                                                                                                                                                                                                                                                                                                                                                                                                                                                                                                                                                          |

**Table S5.** Multiple sequence alignment (20) of ND6 (top) and ND4L (bottom) from different species.

|                                  | -11 | -1  | 10S | 20A | 30L | 40C | 49S | 59Y | 69Y | 79P | 88I | 94- | 96- | 96V | 105V |
|----------------------------------|-----|-----|-----|-----|-----|-----|-----|-----|-----|-----|-----|-----|-----|-----|------|
| <i>Mus musculus</i>              | 1   | --- | --- | --- | --- | --- | --- | --- | --- | --- | --- | --- | --- | --- | ---  |
| <i>Escherichia coli</i>          | 1   | --- | --- | --- | --- | --- | --- | --- | --- | --- | --- | --- | --- | --- | ---  |
| <i>Thermus thermophilus</i>      | 1   | --- | --- | --- | --- | --- | --- | --- | --- | --- | --- | --- | --- | --- | ---  |
| <i>Bos taurus</i>                | 1   | --- | --- | --- | --- | --- | --- | --- | --- | --- | --- | --- | --- | --- | ---  |
| <i>Homo sapiens</i>              | 1   | --- | --- | --- | --- | --- | --- | --- | --- | --- | --- | --- | --- | --- | ---  |
| <i>Sus scrofa</i>                | 1   | --- | --- | --- | --- | --- | --- | --- | --- | --- | --- | --- | --- | --- | ---  |
| <i>Yarrowia lipolytica</i>       | 1   | --- | --- | --- | --- | --- | --- | --- | --- | --- | --- | --- | --- | --- | ---  |
| <i>Rickettsia prowazekii</i>     | 1   | --- | --- | --- | --- | --- | --- | --- | --- | --- | --- | --- | --- | --- | ---  |
| <i>Arabidopsis thaliana</i>      | 1   | --- | --- | --- | --- | --- | --- | --- | --- | --- | --- | --- | --- | --- | ---  |
| <i>Chlamydomonas reinhardtii</i> | 1   | --- | --- | --- | --- | --- | --- | --- | --- | --- | --- | --- | --- | --- | ---  |
| <i>Paracoccus denitrificans</i>  | 1   | --- | --- | --- | --- | --- | --- | --- | --- | --- | --- | --- | --- | --- | ---  |
| <i>Rhodobacter capsulatus</i>    | 1   | --- | --- | --- | --- | --- | --- | --- | --- | --- | --- | --- | --- | --- | ---  |
| <i>Petromyzon marinus</i>        | 1   | --- | --- | --- | --- | --- | --- | --- | --- | --- | --- | --- | --- | --- | ---  |
| <i>Neurospora crassa</i>         | 1   | --- | --- | --- | --- | --- | --- | --- | --- | --- | --- | --- | --- | --- | ---  |
| <i>Drosophila melanogaster</i>   | 1   | --- | --- | --- | --- | --- | --- | --- | --- | --- | --- | --- | --- | --- | ---  |
| <i>Caenorhabditis elegans</i>    | 1   | --- | --- | --- | --- | --- | --- | --- | --- | --- | --- | --- | --- | --- | ---  |
| <i>Escherichia coli</i>          | 1   | --- | --- | --- | --- | --- | --- | --- | --- | --- | --- | --- | --- | --- | ---  |
| <i>Escherichia coli</i>          | 1   | --- | --- | --- | --- | --- | --- | --- | --- | --- | --- | --- | --- | --- | ---  |
| <i>Shigella flexneri</i>         | 1   | --- | --- | --- | --- | --- | --- | --- | --- | --- | --- | --- | --- | --- | ---  |
| <i>Pseudomonas aeruginosa</i>    | 1   | --- | --- | --- | --- | --- | --- | --- | --- | --- | --- | --- | --- | --- | ---  |
| <i>Buchnera aphidicola</i>       | 1   | --- | --- | --- | --- | --- | --- | --- | --- | --- | --- | --- | --- | --- | ---  |
| <i>Buchnera aphidicola</i>       | 1   | --- | --- | --- | --- | --- | --- | --- | --- | --- | --- | --- | --- | --- | ---  |
| <i>Buchnera aphidicola</i>       | 1   | --- | --- | --- | --- | --- | --- | --- | --- | --- | --- | --- | --- | --- | ---  |

  

|                                  | 114V | 121- | 121- | 121- | 121- | 127E | 137G | 147C | 157W | 166I | +4  | +14 | +24 | +34 |
|----------------------------------|------|------|------|------|------|------|------|------|------|------|-----|-----|-----|-----|
| <i>Mus musculus</i>              | 107  | ---  | ---  | ---  | ---  | ---  | ---  | ---  | ---  | ---  | --- | --- | --- | --- |
| <i>Escherichia coli</i>          | 111  | ---  | ---  | ---  | ---  | ---  | ---  | ---  | ---  | ---  | --- | --- | --- | --- |
| <i>Thermus thermophilus</i>      | 108  | ---  | ---  | ---  | ---  | ---  | ---  | ---  | ---  | ---  | --- | --- | --- | --- |
| <i>Bos taurus</i>                | 108  | ---  | ---  | ---  | ---  | ---  | ---  | ---  | ---  | ---  | --- | --- | --- | --- |
| <i>Homo sapiens</i>              | 107  | ---  | ---  | ---  | ---  | ---  | ---  | ---  | ---  | ---  | --- | --- | --- | --- |
| <i>Sus scrofa</i>                | 108  | ---  | ---  | ---  | ---  | ---  | ---  | ---  | ---  | ---  | --- | --- | --- | --- |
| <i>Yarrowia lipolytica</i>       | 111  | ---  | ---  | ---  | ---  | ---  | ---  | ---  | ---  | ---  | --- | --- | --- | --- |
| <i>Rickettsia prowazekii</i>     | 107  | ---  | ---  | ---  | ---  | ---  | ---  | ---  | ---  | ---  | --- | --- | --- | --- |
| <i>Arabidopsis thaliana</i>      | 105  | ---  | ---  | ---  | ---  | ---  | ---  | ---  | ---  | ---  | --- | --- | --- | --- |
| <i>Chlamydomonas reinhardtii</i> | 103  | ---  | ---  | ---  | ---  | ---  | ---  | ---  | ---  | ---  | --- | --- | --- | --- |
| <i>Paracoccus denitrificans</i>  | 108  | ---  | ---  | ---  | ---  | ---  | ---  | ---  | ---  | ---  | --- | --- | --- | --- |
| <i>Rhodobacter capsulatus</i>    | 110  | ---  | ---  | ---  | ---  | ---  | ---  | ---  | ---  | ---  | --- | --- | --- | --- |
| <i>Petromyzon marinus</i>        | 101  | ---  | ---  | ---  | ---  | ---  | ---  | ---  | ---  | ---  | --- | --- | --- | --- |
| <i>Neurospora crassa</i>         | 121  | ---  | ---  | ---  | ---  | ---  | ---  | ---  | ---  | ---  | --- | --- | --- | --- |
| <i>Drosophila melanogaster</i>   | 102  | ---  | ---  | ---  | ---  | ---  | ---  | ---  | ---  | ---  | --- | --- | --- | --- |
| <i>Caenorhabditis elegans</i>    | 126  | ---  | ---  | ---  | ---  | ---  | ---  | ---  | ---  | ---  | --- | --- | --- | --- |
| <i>Escherichia coli</i>          | 111  | ---  | ---  | ---  | ---  | ---  | ---  | ---  | ---  | ---  | --- | --- | --- | --- |
| <i>Escherichia coli</i>          | 111  | ---  | ---  | ---  | ---  | ---  | ---  | ---  | ---  | ---  | --- | --- | --- | --- |
| <i>Shigella flexneri</i>         | 111  | ---  | ---  | ---  | ---  | ---  | ---  | ---  | ---  | ---  | --- | --- | --- | --- |
| <i>Pseudomonas aeruginosa</i>    | 111  | ---  | ---  | ---  | ---  | ---  | ---  | ---  | ---  | ---  | --- | --- | --- | --- |
| <i>Buchnera aphidicola</i>       | 111  | ---  | ---  | ---  | ---  | ---  | ---  | ---  | ---  | ---  | --- | --- | --- | --- |
| <i>Buchnera aphidicola</i>       | 111  | ---  | ---  | ---  | ---  | ---  | ---  | ---  | ---  | ---  | --- | --- | --- | --- |
| <i>Buchnera aphidicola</i>       | 111  | ---  | ---  | ---  | ---  | ---  | ---  | ---  | ---  | ---  | --- | --- | --- | --- |

  

|                                   | -11 | -1  | 10M | 20L | 30L | 40L | 50N | 60P | 70E | 80K | 90V |
|-----------------------------------|-----|-----|-----|-----|-----|-----|-----|-----|-----|-----|-----|
| <i>Mus musculus</i>               | --- | --- | --- | --- | --- | --- | --- | --- | --- | --- | --- |
| <i>Escherichia coli</i>           | --- | --- | --- | --- | --- | --- | --- | --- | --- | --- | --- |
| <i>Thermus thermophilus</i>       | --- | --- | --- | --- | --- | --- | --- | --- | --- | --- | --- |
| <i>Deinococcus radiodurans</i>    | --- | --- | --- | --- | --- | --- | --- | --- | --- | --- | --- |
| <i>Rickettsia prowazekii</i>      | --- | --- | --- | --- | --- | --- | --- | --- | --- | --- | --- |
| <i>Arabidopsis thaliana</i>       | --- | --- | --- | --- | --- | --- | --- | --- | --- | --- | --- |
| <i>Paracoccus denitrificans</i>   | --- | --- | --- | --- | --- | --- | --- | --- | --- | --- | --- |
| <i>Rhodobacter capsulatus</i>     | --- | --- | --- | --- | --- | --- | --- | --- | --- | --- | --- |
| <i>Sus scrofa</i>                 | --- | --- | --- | --- | --- | --- | --- | --- | --- | --- | --- |
| <i>Bos taurus</i>                 | --- | --- | --- | --- | --- | --- | --- | --- | --- | --- | --- |
| <i>Homo sapiens</i>               | --- | --- | --- | --- | --- | --- | --- | --- | --- | --- | --- |
| <i>Petromyzon marinus</i>         | --- | --- | --- | --- | --- | --- | --- | --- | --- | --- | --- |
| <i>Mycobacterium tuberculosis</i> | --- | --- | --- | --- | --- | --- | --- | --- | --- | --- | --- |
| <i>Streptomyces coelicolor</i>    | --- | --- | --- | --- | --- | --- | --- | --- | --- | --- | --- |
| <i>Yarrowia lipolytica</i>        | --- | --- | --- | --- | --- | --- | --- | --- | --- | --- | --- |
| <i>Neurospora crassa</i>          | --- | --- | --- | --- | --- | --- | --- | --- | --- | --- | --- |
| <i>Drosophila melanogaster</i>    | --- | --- | --- | --- | --- | --- | --- | --- | --- | --- | --- |
| <i>Aquifex aeolicus</i>           | --- | --- | --- | --- | --- | --- | --- | --- | --- | --- | --- |
| <i>Caenorhabditis elegans</i>     | --- | --- | --- | --- | --- | --- | --- | --- | --- | --- | --- |
| <i>Rhizobium leguminosarum</i>    | --- | --- | --- | --- | --- | --- | --- | --- | --- | --- | --- |
| <i>Escherichia coli</i>           | --- | --- | --- | --- | --- | --- | --- | --- | --- | --- | --- |
| <i>Escherichia coli</i>           | --- | --- | --- | --- | --- | --- | --- | --- | --- | --- | --- |
| <i>Shigella flexneri</i>          | --- | --- | --- | --- | --- | --- | --- | --- | --- | --- | --- |
| <i>Pseudomonas aeruginosa</i>     | --- | --- | --- | --- | --- | --- | --- | --- | --- | --- | --- |
| <i>Buchnera aphidicola</i>        | --- | --- | --- | --- | --- | --- | --- | --- | --- | --- | --- |
| <i>Buchnera aphidicola</i>        | --- | --- | --- | --- | --- | --- | --- | --- | --- | --- | --- |
| <i>Buchnera aphidicola</i>        | --- | --- | --- | --- | --- | --- | --- | --- | --- | --- | --- |

**Table S6.** Disease related mutations of subunits ND1/ND3/ND4L/ND6, encoded by mitochondrial DNA as contained in MITOMAP (22).

| Nucleotide Position | Locus  | Nucleotide Change | Reported Disease                                           | residue | from AA | to AA |
|---------------------|--------|-------------------|------------------------------------------------------------|---------|---------|-------|
| 3308                | MT-ND1 | T-G               | Sudden Infant Death                                        | 1       | M       | *     |
| 3308                | MT-ND1 | T-C               | MELAS / DEAF enhancer /hypertension / LVNC /putative LHON  | 1       | M       | T     |
| 3310                | MT-ND1 | C-T               | Diabetes / HCM                                             | 2       | P       | S     |
| 3316                | MT-ND1 | G-A               | Diabetes / LHON / PEO                                      | 4       | A       | T     |
| 3335                | MT-ND1 | T-C               | LHON                                                       | 10      | I       | T     |
| 3336                | MT-ND1 | T-C               | Carotid atherosclerosis risk                               |         |         |       |
| 3337                | MT-ND1 | G-A               | Cardiomyopathy                                             | 11      | V       | M     |
| 3340                | MT-ND1 | C-T               | Encephalomyopathy                                          | 12      | P       | S     |
| 3376                | MT-ND1 | G-A               | LHON MELAS overlap                                         | 24      | E       | K     |
| 3380                | MT-ND1 | G-A               | MELAS                                                      | 25      | R       | Q     |
| 3388                | MT-ND1 | C-A               | Maternally Inherited Nonsyndromic Deafness                 | 28      | L       | M     |
| 3391                | MT-ND1 | G-A               | LHON                                                       | 29      | G       | S     |
| 3394                | MT-ND1 | T-C               | LHON / Diabetes /CPT deficiency / high altitude adaptation | 30      | Y       | H     |
| 3395                | MT-ND1 | A-G               | LHON / HCM with hearing loss                               | 30      | Y       | C     |
| 3396                | MT-ND1 | T-C               | NSHL / MIDD                                                |         |         |       |
| 3397                | MT-ND1 | A-G               | ADPD / Possibly LVNC-cardiomyopathy associated             | 31      | M       | V     |
| 3398                | MT-ND1 | T-C               | DMDF+HCM / GDM / possibly LVNC-cardiomyopathy associated   | 31      | M       | T     |
| 3399                | MT-ND1 | A-T               | Gestational Diabetes (GDM)                                 | 31      | M       | I     |
| 3407                | MT-ND1 | G-A               | HCM / Muscle involvement                                   | 34      | R       | H     |
| 3407                | MT-ND1 | G-A               | HCM / Muscle involvement                                   | 34      | R       | H     |
| 3418                | MT-ND1 | A-G               | AMegL                                                      | 38      | N       | D     |
| 3421                | MT-ND1 | G-A               | MIDD                                                       | 39      | V       | I     |
| 3460                | MT-ND1 | G-A               | LHON                                                       | 52      | A       | T     |
| 3472                | MT-ND1 | T-C               | LHON                                                       | 56      | F       | L     |
| 3481                | MT-ND1 | G-A               | MELAS / Progressive Encephalomyopathy                      | 59      | E       | K     |
| 3488                | MT-ND1 | T-C               | LHON                                                       | 61      | L       | P     |
| 3496                | MT-ND1 | G-T               | LHON                                                       | 64      | A       | S     |
| 3497                | MT-ND1 | C-T               | LHON                                                       | 64      | A       | V     |
| 3551                | MT-ND1 | C-T               | LHON                                                       | 82      | A       | V     |
| 3632                | MT-ND1 | C-T               | LHON                                                       | 109     | S       | F     |
| 3634                | MT-ND1 | A-G               | LHON                                                       | 110     | S       | G     |
| 3635                | MT-ND1 | G-A               | LHON                                                       | 110     | S       | N     |
| 3644                | MT-ND1 | T-C               | BD-associated                                              | 113     | V       | A     |
| 3667                | MT-ND1 | T-G               | Peripheral neuropathy of T2 diabetes                       | 121     | W       | G     |
| 3688                | MT-ND1 | G-A               | Leigh Syndrome                                             | 128     | A       | T     |
| 3697                | MT-ND1 | G-A               | MELAS / LS / LDYT / BSN                                    | 131     | G       | S     |
| 3700                | MT-ND1 | G-A               | LHON                                                       | 132     | A       | T     |
| 3713                | MT-ND1 | T-C               | LHON                                                       | 136     | V       | A     |
| 3733                | MT-ND1 | G-C               | LHON                                                       | 143     | E       | Q     |
| 3733                | MT-ND1 | G-A               | LHON                                                       | 143     | E       | K     |
| 3736                | MT-ND1 | G-A               | LHON                                                       | 144     | V       | I     |
| 3745                | MT-ND1 | G-A               | LHON / high altitude variant                               | 147     | A       | T     |
| 3769                | MT-ND1 | C-G               | LHON                                                       | 155     | L       | V     |
| 3781                | MT-ND1 | T-C               | LHON                                                       | 159     | S       | P     |
| 3796                | MT-ND1 | A-G               | Adult-Onset Dystonia                                       | 164     | T       | A     |
| 3833                | MT-ND1 | T-A               | PEG                                                        | 176     | L       | Q     |

|       |         |     |                                                                                                                                                     |     |   |   |
|-------|---------|-----|-----------------------------------------------------------------------------------------------------------------------------------------------------|-----|---|---|
| 3866  | MT-ND1  | T-C | LHON +limb claudication                                                                                                                             | 187 | I | T |
| 3890  | MT-ND1  | G-A | Progressive Encephalomyopathy / LS /Optic Atrophy                                                                                                   | 195 | R | Q |
| 3919  | MT-ND1  | T-C | LHON                                                                                                                                                | 205 | S | P |
| 3946  | MT-ND1  | G-A | MELAS                                                                                                                                               | 214 | E | K |
| 3949  | MT-ND1  | T-C | MELAS                                                                                                                                               | 215 | Y | H |
| 3958  | MT-ND1  | G-A | LHON                                                                                                                                                | 218 | G | S |
| 3959  | MT-ND1  | G-A | MELAS                                                                                                                                               | 218 | G | D |
| 3995  | MT-ND1  | A-G | MELAS                                                                                                                                               | 230 | N | S |
| 4081  | MT-ND1  | T-C | LHON                                                                                                                                                | 259 | F | L |
| 4123  | MT-ND1  | A-T | LHON                                                                                                                                                | 273 | I | F |
| 4132  | MT-ND1  | G-A | NAION-associated                                                                                                                                    | 276 | A | T |
| 4136  | MT-ND1  | A-G | LHON                                                                                                                                                | 277 | Y | C |
| 4142  | MT-ND1  | G-A | Developmental delay, seizure, hypotonia                                                                                                             | 279 | R | Q |
| 4160  | MT-ND1  | T-C | LHON                                                                                                                                                | 285 | L | P |
| 4163  | MT-ND1  | T-C | LHON                                                                                                                                                | 286 | M | T |
| 4171  | MT-ND1  | C-A | LHON / Leigh-like phenotype                                                                                                                         | 289 | L | M |
| 4216  | MT-ND1  | T-C | LHON / Insulin Resistance/possible adaptive high altitude variant                                                                                   | 304 | Y | H |
| 10086 | MT-ND3  | A-G | Hypertensive end-stage renal disease                                                                                                                | 10  | N | D |
| 10158 | MT-ND3  | T-C | Leigh Disease / MELAS                                                                                                                               | 34  | S | P |
| 10191 | MT-ND3  | T-C | Leigh Disease /Leigh-like Disease / ESOC                                                                                                            | 45  | S | P |
| 10197 | MT-ND3  | G-A | Leigh Disease / Dystonia/ Stroke / LDYT                                                                                                             | 47  | A | T |
| 10237 | MT-ND3  | T-C | LHON                                                                                                                                                | 60  | I | T |
| 10254 | MT-ND3  | G-A | Leigh Disease                                                                                                                                       | 66  | D | N |
| 10398 | MT-ND3  | A-G | PD protective factor /longevity / altered cell pH / metabolic syndrome /breast cancer risk / LS risk / ADHD / cognitive decline / SCA2 age of onset | 114 | T | A |
| 10398 | MT-ND3  | A-A | Invasive Breast Cancer risk factor AD PD BD lithium response Type 2DM                                                                               |     |   |   |
| 10543 | MT-ND4L | A-G | LHON                                                                                                                                                | 25  | H | R |
| 10591 | MT-ND4L | T-G | LHON                                                                                                                                                | 41  | F | C |
| 10652 | MT-ND4L | T-C | BD / MDD-associated                                                                                                                                 |     |   |   |
| 10663 | MT-ND4L | T-C | LHON                                                                                                                                                | 65  | V | A |
| 10680 | MT-ND4L | G-A | LHON / synergistic combo 10680A + 12033G + 14258A                                                                                                   | 71  | A | T |
| 14163 | MT-ND6  | C-T | Possible deafness factor                                                                                                                            | 174 | N | H |
| 14258 | MT-ND6  | G-A | LHON synergistic combo 10680A + 12033G + 14258A also combo 14258A +14582G                                                                           | 174 | N | H |
| 14279 | MT-ND6  | G-A | LHON                                                                                                                                                | 174 | N | H |
| 14319 | MT-ND6  | T-C | PD, early onset                                                                                                                                     | 174 | N | H |
| 14325 | MT-ND6  | T-C | LHON                                                                                                                                                | 174 | N | H |
| 14340 | MT-ND6  | C-T | SNHL                                                                                                                                                | 174 | N | H |
| 14430 | MT-ND6  | A-G | Thyroid Cancer                                                                                                                                      | 174 | N | H |
| 14439 | MT-ND6  | G-A | Mitochondrial Respiratory Chain Disorder                                                                                                            | 174 | N | H |
| 14453 | MT-ND6  | G-A | MELAS / Leigh Disease                                                                                                                               | 174 | N | H |
| 14459 | MT-ND6  | G-A | LDYT / Leigh Disease /dystonia / carotid atherosclerosis risk                                                                                       | 174 | N | H |
| 14482 | MT-ND6  | C-G | LHON                                                                                                                                                | 174 | N | H |
| 14482 | MT-ND6  | C-A | LHON                                                                                                                                                | 174 | N | H |
| 14484 | MT-ND6  | T-C | LHON                                                                                                                                                | 174 | N | H |

|       |        |     |                                                     |     |   |   |
|-------|--------|-----|-----------------------------------------------------|-----|---|---|
| 14487 | MT-ND6 | T-C | Dystonia / Leigh Disease/ ataxia / ptosis /epilepsy | 174 | N | H |
| 14495 | MT-ND6 | A-G | LHON                                                | 174 | N | H |
| 14498 | MT-ND6 | T-C | LHON                                                | 174 | N | H |
| 14502 | MT-ND6 | T-C | LHON                                                | 174 | N | H |
| 14568 | MT-ND6 | C-T | LHON                                                | 174 | N | H |
| 14577 | MT-ND6 | T-C | MIDM                                                | 174 | N | H |
| 14582 | MT-ND6 | A-G | LHON synergistic combo 14258A + 14582G              | 174 | N | H |
| 14596 | MT-ND6 | A-T | LHON                                                | 174 | N | H |
| 14600 | MT-ND6 | G-A | Leigh Disease w/ optic atrophy                      | 174 | N | H |
| 14668 | MT-ND6 | C-T | Depressive Disorder associated                      | 174 | N | Y |

**Table S7.** Benchmarking the quantum chemical calculations using different density functionals against *ab initio* random-phase approximation (RPA) and domain-based local pair natural orbital coupled cluster theory with single-double and perturbative triples (DLPNO-CCSD(T)). **Top:** 381 atom DFT-model system (see Table S4) at the def2-TZVP/ $\epsilon=4$  level. **Middle:** 131 atom DFT-model system (see Table S4) at the def2-TZVP level and RPA/aug-cc-pVTZ level. **Bottom:** 27 atom DFT-model system, comprising an array of three water molecules, between two carboxylates (side chains of D66<sup>ND3</sup> and E34<sup>ND4L</sup>), at the def2-TZVP level for the DFT calculations and using aug-cc-pVTZ basis set for the DLPNO-CCSD(T) and RPA calculations. Energies are given in kcal mol<sup>-1</sup>.

| <i>N</i> =381 atoms<br>Proton position | B3LYP-D3 | CAM-B3LYP-D3 | CAMh-B3LYP-D3 | $\omega$ B97XD | TPSSh-D3 |
|----------------------------------------|----------|--------------|---------------|----------------|----------|
| D66                                    | 0.0      | 0.0          | 0.0           | 0.0            | 0.0      |
| TS1                                    | 15.4     | 14.9         | 15.8          | 17.3           | 14.3     |
| E34                                    | 5.9      | 5.6          | 6.4           | 6.0            | 6.3      |
| TS2                                    | 16.4     | 15.9         | 17.1          | 18.0           | 16.1     |
| E70                                    | 11.3     | 10.9         | 12.0          | 11.4           | 11.8     |

| <i>N</i> =131 atoms | RPA  | B3LYP-D3 | CAM-B3LYP-D3 | CAMh-B3LYP-D3 | $\omega$ B97XD | TPSSh-D3 |
|---------------------|------|----------|--------------|---------------|----------------|----------|
| Reactant state      | 0.0  | 0.0      | 0.0          | 0.0           | 0.0            | 0.0      |
| Transition state    | 20.4 | 15.9     | 15.5         | 16.5          | 18.4           | 15.0     |
| Product state       | 7.9  | 6.8      | 6.4          | 7.4           | 7.4            | 7.2      |

| <i>N</i> =27 atoms | DLPNO-<br>CCSD(T) | RPA  | B3LYP-D3 | CAM-<br>B3LYP-D3 | CAMh-<br>B3LYP-D3 | $\omega$ B97XD | TPSSh-D3 |
|--------------------|-------------------|------|----------|------------------|-------------------|----------------|----------|
| Reactant state     | 0.0               | 0.0  | 0.0      | 0.0              | 0.0               | 0.0            | 0.0      |
| Transition state   | 23.5              | 23.4 | 19.3     | 18.7             | 19.3              | 21.3           | 17.9     |
| Product state      | 0.1               | 0.2  | -0.4     | -0.8             | -0.6              | 0.1            | -0.9     |



**Table S8.** Subunit naming in different complex I isoforms.

| <b>Mouse</b> | <b><i>T. thermophilus</i></b> | <b><i>E. coli</i></b> | <b>Cyanobacteria</b> |
|--------------|-------------------------------|-----------------------|----------------------|
| ND1          | Nqo8                          | NuoH                  | NdhA                 |
| ND2          | Nqo14                         | NuoN                  | NdhB                 |
| ND3          | Nqo7                          | NuoA                  | NdhC                 |
| ND4          | Nqo13                         | NuoM                  | NdhD                 |
| ND4L         | Nqo11                         | NuoK                  | NdhE                 |
| ND5          | Nqo12                         | NuoL                  | NdhF                 |
| ND6          | Nqo10                         | NuoJ                  | NdhG                 |
| NDUFS1       | Nqo3                          | NuoG                  | -                    |
| NDUFS2       | Nqo4                          | NuoDa                 | NdhH                 |
| NDUFS3       | Nqo5                          | NuoCa                 | NdhJ                 |
| NDUFS7       | Nqo6                          | NuoB                  | NdhK                 |
| NDUFS8       | Nqo9                          | NuoI                  | NdhI                 |
| NDUFV1       | Nqo1                          | NuoF                  | -                    |
| NDUFV2       | Nqo2                          | NuoE                  | -                    |

**Table S9.** Force field parameters for H<sub>3</sub>O<sup>+</sup> used in the classical simulations in the deactive state.

| <b>Atom</b>  | <b><math>q</math> (e)</b>                                             | <b><math>e_i</math> (kcalmol<sup>-1</sup>) <math>R_{\min}/2</math> (Å)</b> |        |
|--------------|-----------------------------------------------------------------------|----------------------------------------------------------------------------|--------|
| O            | -0.521                                                                | -0.1521                                                                    | 1.7682 |
| H            | +0.507                                                                | -0.46                                                                      | 0.2245 |
| <b>Bond</b>  | <b><math>k_b</math> (kcal mol<sup>-1</sup> Å<sup>-2</sup>)</b>        | <b><math>r_0</math> (Å)</b>                                                |        |
| O-H          | 450                                                                   | 1.05                                                                       |        |
| <b>Angle</b> | <b><math>k_\theta</math> (kcal mol<sup>-1</sup> rad<sup>-2</sup>)</b> | <b><math>\theta_0</math> (deg)</b>                                         |        |
| H-O-H        | 55                                                                    | 113.3                                                                      |        |

## SI References

1. G. Fiorin, M. L. Klein, J. Hénin, Using collective variables to drive molecular dynamics simulations, *Mol. Phys.*, **111**, 3345-3362 (2013).
2. P. Liu, F. Dehez, W. Cai, C. Chipot, A toolkit for the analysis of free-energy perturbation calculations, *J. Chem. Theor. Comput.*, **8**, 2606-2616 (2012).
3. C. H. Bennett, Efficient estimation of free energy differences from Monte Carlo data, *J. Comput. Phys.* **22**, 245–268 (1976).
4. A. D. Becke, Density-functional thermochemistry. III. The role of exact exchange, *J. Chem. Phys.* **98**, 5648–5652 (1993).
5. C. Lee, W. Yang, R. G. Parr, Development of the Colle-Salvetti correlation-energy formula into a functional of the electron density. *Phys. Rev. B* **37**, 785–789 (1988).
6. S. Grimme, J. Antony, S. Ehrlich, H. Krieg, A consistent and accurate ab initio parametrization of density functional dispersion correction (DFT-D) for the 94 elements H-Pu. *J. Chem. Phys.* **132**, 154104-1–19 (2010).
7. T. Yanai, D. P. Tew, N. C. Handy, A new hybrid exchange-correlation functional using the Coulomb-attenuating method (CAM-B3LYP). *Chem. Phys. Lett.* **393**, 51–57 (2004).
8. Shao, Y. Mei, D. Sundholm, V. R. I. Kaila, Benchmarking the Performance of Time-Dependent Density Functional Theory Methods on Biochromophores. *J. Chem. Theory Comput.* **16**, 587–600 (2020).
9. J. Da Chai, M. Head-Gordon, Long-range corrected hybrid density functionals with damped atom-atom dispersion corrections. *Phys. Chem. Chem. Phys.* **10**, 6615–6620 (2008).
10. J. Tao, J. P. Perdew, V. N. Staroverov, G. E. Scuseria, Climbing the density functional ladder: Nonempirical meta-generalized gradient approximation designed for molecules and solids. *Phys. Rev. Lett.* **91**, 146401 (2003).
11. F. Furche, Molecular tests of the random phase approximation to the exchange-correlation energy functional. *Phys. Rev. B - Condens. Matter Mater. Phys.* **64** (2001).
12. C. Riplinger, B. Sandhoefer), A. Hansen, F. Neese, Natural triple excitations in local coupled cluster calculations with pair natural orbitals *J. Chem. Phys.* **139**, 134101 (2013).
13. F. Weigend, R. Ahlrichs, Balanced basis sets of split valence, triple zeta valence and quadruple zeta valence quality for H to Rn: Design and assessment of accuracy. *Phys. Chem. Chem. Phys.* **7**, 3297–3305 (2005).
14. R. A. Kendall, T. H. Dunning, R. J. Harrison, Electron affinities of the first-row atoms revisited. Systematic basis sets and wave functions. *J. Chem. Phys.* **96**, 6796–6806 (1992).
15. R. Ahlrichs, M. Bär, M. Häser, H. Horn, C. Kölmel, Electronic structure calculations on workstation computers: The program system turbomole. *Chem. Phys. Lett.*, **162**, 165–169 (1989).
16. F. Neese, F. Wennmohs, U. Becker, C. Riplinger, The ORCA quantum chemistry program package. *J. Chem. Phys.* **152**, 224108 (2020).
17. R. Baradaran, J. M., Berrisford, G. S. Minhas, L.A. Sazanov, Crystal structure of the entire respiratory complex I, *Nature*, **494**, 443–448, (2013).
18. J. M. Schuller, *et al.*, Redox-coupled proton pumping drives carbon concentration in the photosynthetic complex I. *Nat. Commun.* **11**, 494, (2020).
19. K. Parey, *et al.* High-resolution cryo-EM structures of respiratory complex I: Mechanism, assembly, and disease, *Sci. Adv.* **5**, eaax9484 (2019).
20. F. Sievers, *et al.* Fast, scalable generation of high-quality protein multiple sequence alignments using Clustal Omega, *Mol. Syst. Biol.* **7** (2011).
21. J. Warnau, *et al.* Redox-Coupled Quinone Dynamics in the Respiratory Complex I. *Proc. Natl. Acad. Sci. USA*, **115**, E8413–E8420 (2018).
22. M. T. Lott, *et al.* MtDNA variation and analysis using Mitomap and Mitomaster. *Curr. Protoc. Bioinforma.* **44**, 1.23.1-1.23.26 (2013).
23. M. Kervinen, J. Pätsi, M., Finel, I. E. Hassinen, A Pair of Membrane-Embedded Acidic Residues in the NuoK Subunit of Escherichia coli NDH-1, a Counterpart of the ND4L Subunit of the Mitochondrial Complex I, Are Required for High Ubiquinone Reductase Activity, *Biochemistry* **43**, 773–781 (2004).

24. C. Kao, E. Nakamaru-Ogiso, A. Matsuno-Yagi, T. Yagi, Characterization of the membrane domain subunit NuoK (ND4L) of the NADH-quinone oxidoreductase from *Escherichia coli*, *Biochemistry* **44**, 9545–9554 (2005).
25. E. D. López, *et al.*, WATCLUST: A tool for improving the design of drugs based on protein-water interactions. *Bioinformatics* **31**, 3697–3699 (2015).
26. K. Nilsson, D. Lecerof, E. Sigfridsson, U. Ryde, An automatic method to generate force-field parameters for hetero-compounds. *Acta Cryst. D* **59**, 274–289 (2003).
27. C.I. Bayly, P. Cieplak, W.D. Cornell, P.A. Kollman, A Well-Behaved Electrostatic Potential Based Method Using Charge Restraints For Determining Atom-Centered Charges: The RESP Model. *J. Phys. Chem.* **97**, 10269–10280(1993).
28. R. B. Best, *et al.*, Optimization of the additive CHARMM all-atom protein force field targeting improved sampling of the backbone  $\phi$ ,  $\psi$  and side-chain  $\chi_1$  and  $\chi_2$  Dihedral Angles. *J. Chem. Theory Comput.* **8**, 3257–3273 (2012).
29. P. Plessow, Reaction path optimization without NEB springs or interpolation algorithms, *J. Chem. Theory Comput.* **9**, 1305–1310 (2013).
